# Supplementary material for: Transcription-factor occupancy at HOT regions quantitatively predicts RNA polymerase recruitment in five human cell lines
Source: Springer Nature journal article supplement (doi:10.1186/1471-2164-14-720), 2013-01-01
Supplement: 12864_2013_7136_MOESM1_ESM.pdf [file 12864_2013_7136_MOESM1_ESM.pdf]

Table S1: ChIP-seq samples used in this analysis. Most TFs were not tested in most of the 5 cell lines. Symbols indicate which laboratory performed the experiment: M, Myers (HudsonAlpha); S, Snyder (Yale/Stanford); B, Bernstein (Broad); the number of symbols shows the number of replicates. Different antibodies to the same protein (e.g. MafK\_ab50322, MafK\_SC-477) showed very similar results and therefore were not treated distinctly for analysis.

|                | GM12878                        | H1-hESC | HeLa-S3 | HepG2 | K562   |
|----------------|--------------------------------|---------|---------|-------|--------|
|                | canonical transcription factor |         |         |       |        |
| ATF2           | MM                             | MM      |         |       |        |
| ATF3           | MM                             | MM      |         | MM    | MM     |
| BATF           | MM                             |         |         |       |        |
| BCL11A         | MM                             | MM      |         |       |        |
| BCL3           | MM                             |         |         |       |        |
| BCLAF1         | MM                             |         |         |       | MM     |
| BHLHE40        | SS                             |         |         | MMSS  | SS     |
| CEBPB          |                                |         | SS      | MMSS  | SS     |
| CEBPD          |                                |         |         | MM    |        |
| E2F6           |                                |         |         |       | MM     |
| EBF1           | MMSS                           |         |         |       |        |
| EGR1           | MMM                            | MM      |         |       | MM     |
| ELF1           | MM                             |         |         | MM    | MM     |
| ETS1           | MM                             |         |         |       | MM     |
| FAM48A (SPT20) |                                |         | SS      |       |        |
| FOS (c-Fos)    | SSS                            |         | SS      |       | SSS    |
| FOSL1          |                                | MM      |         |       | MM     |
| FOSL2          |                                |         |         | MM    |        |
| FOXA1          |                                |         |         | MMMM  |        |
| FOXA2          |                                |         |         | MM    |        |
| GABPA (GABP)   | MM                             | MM      | MM      | MM    | MM     |
| GATA2          |                                |         |         |       | MM     |
| HEY1           |                                |         |         | MM    |        |
| HNF4A          |                                |         |         | MM    |        |
| HNF4G          |                                |         |         | MM    |        |
| IRF3           | SS                             |         | SS      | SS    |        |
| IRF4           | MM                             |         |         |       |        |
| JUN (c-Jun)    |                                | SS      | SS      | SS    | SS     |
| JUND           | SS                             | MMSS    | SS      | MMSS  | SS     |
| MAFF           |                                |         |         | SS    | SS     |
| MAFK           |                                |         |         | SSSS  | SS     |
| MAX            | SS                             |         | SSSS    | SS    | MMSSSS |
| MEF2A          | MM                             |         |         |       | MM     |
| MEF2C          | MM                             |         |         |       |        |
| MTA3           | MM                             |         |         |       |        |
| MXI1           | SS                             |         | SS      |       | SS     |
| MYC (c-Myc)    |                                | SS      | SS      |       | SSSS   |
| NANOG          |                                | MM      |         |       |        |
| NFATC1         | MM                             |         |         |       |        |
| NFE2           | SS                             |         |         |       | SS     |
| NFIC           |                                |         |         | MM    |        |
| NFYA           |                                |         |         |       | SS     |

|                     | GM12878  | H1-hESC | HeLa-S3 | HepG2 | K562 |
|---------------------|----------|---------|---------|-------|------|
| NFYB                |          |         |         |       | SS   |
| NRF1                | SS       | SS      | SS      | SS    | SS   |
| PAX5                | MMMM     |         |         |       |      |
| PBX3                | MM       |         |         |       |      |
| PML                 | MM       |         |         |       | MM   |
| POU2F2              | MMM      |         |         |       |      |
| POU5F1              |          | MM      |         |       |      |
| PRDM1               |          |         | SS      |       |      |
| REST (NRSF)         | MMMM     | MM      | MM      | MMMM  | MM   |
| RFX5                | SS       | SS      | SS      | SS    | SS   |
| RUNX3               | MM       |         |         |       |      |
| RXRA                | MM       | MM      |         | MM    |      |
| SIN3A               |          | MM      |         | MM    | MM   |
| SIX5                | MM       | MM      |         |       | MMMM |
| SP1                 | MM       | MM      |         | MM    | MM   |
| SP2                 |          | MM      |         | MM    | MM   |
| SP4                 |          | MM      |         |       |      |
| SPI1 (PU.1)         | MMM      |         |         |       | MM   |
| SRF                 | MMMM     | MM      |         | MM    | MM   |
| STAT1               | SS       |         |         |       |      |
| STAT3               | SS       |         | SS      |       |      |
| STAT5A              | MM       |         |         |       |      |
| TAL1                |          |         |         |       | SS   |
| TCF12               | MM       | MM      |         | MM    |      |
| TCF3                | MM       |         |         |       |      |
| TEAD4               |          |         |         |       | MM   |
| THAP1               |          |         |         |       | MM   |
| USF1                | MM       | MM      |         | MM    | MM   |
| USF2                | SS       | SS      | SS      | SS    | SS   |
| YY1                 | MM       | MM      |         | MM    | MMMM |
| ZBTB33              | MM       |         |         | MMMM  | MM   |
| ZBTB7A              |          |         |         | MM    | MM   |
| ZEB1                | MM       |         |         |       |      |
| ZNF143              | SS       | SS      | SS      |       | SS   |
| cohesin complex     |          |         |         |       |      |
| CTCF                | SS       | MM      |         | MM    | MMSS |
| CTCFL               |          |         |         |       | MM   |
| RAD21               | MMSS     | MMSS    | SS      | MMSS  | MMSS |
| SMC3                | SS       |         | SS      | SS    | SS   |
| chromatin remodeler |          |         |         |       |      |
| BRCA1               | SS       | SS      | SS      | SS    |      |
| CHD2                | SS       |         | SS      | SS    | SS   |
| EP300 (p300)        | MMSSSSSS | MM      | SS      | MMSS  | SSSS |
| HDAC2               |          | MM      |         | MM    | MM   |
| KAT2A (GCN5)        |          |         | SS      |       |      |
| MBD4                |          |         |         | MM    |      |
| SMARCA4 (BRG1)      |          |         | SSS     |       | SS   |
| SMARCB1 (INI1)      |          |         | SSS     |       | SS   |
| SMARCC1 (BAF155)    |          |         | SSS     |       |      |

|                       | GM12878    | H1-hESC | HeLa-S3 | HepG2   | K562      |
|-----------------------|------------|---------|---------|---------|-----------|
| SMARCC2 (BAF170)      |            |         | SSS     |         |           |
| WRNIP1 (WHIP)         | SS         |         |         |         |           |
| XRCC4                 |            |         |         |         | SS        |
| preinitiation complex |            |         |         |         |           |
| GTF2F1                |            |         | SS      |         | SS        |
| TAF1                  | MM         | MM      | MM      | MM      | MM        |
| TAF7                  |            | MM      |         |         | MM        |
| TBP                   | SS         | SS      | SS      | SS      | SS        |
| polymerase            |            |         |         |         |           |
| Pol II-S2P            | SS         | SS      | SS      |         | SS        |
| Pol II-S5P            | MMSSSSSSS  | MM      | MMSSS   | MMSS    | MMSSSS    |
| control               |            |         |         |         |           |
| input                 | MMMMMMSSSS | MS      | MSSSS   | MMMMMMS | MMMMSSSSS |
| histone mark          |            |         |         |         |           |
| H3K27ac               | BB         | BB      | BB      | BB      | BB        |
| H3K4me1               | BB         | BB      | BB      | BB      | BB        |
| H3K4me3               | BB         | BB      | BB      | BB      | BB        |

### All proteins

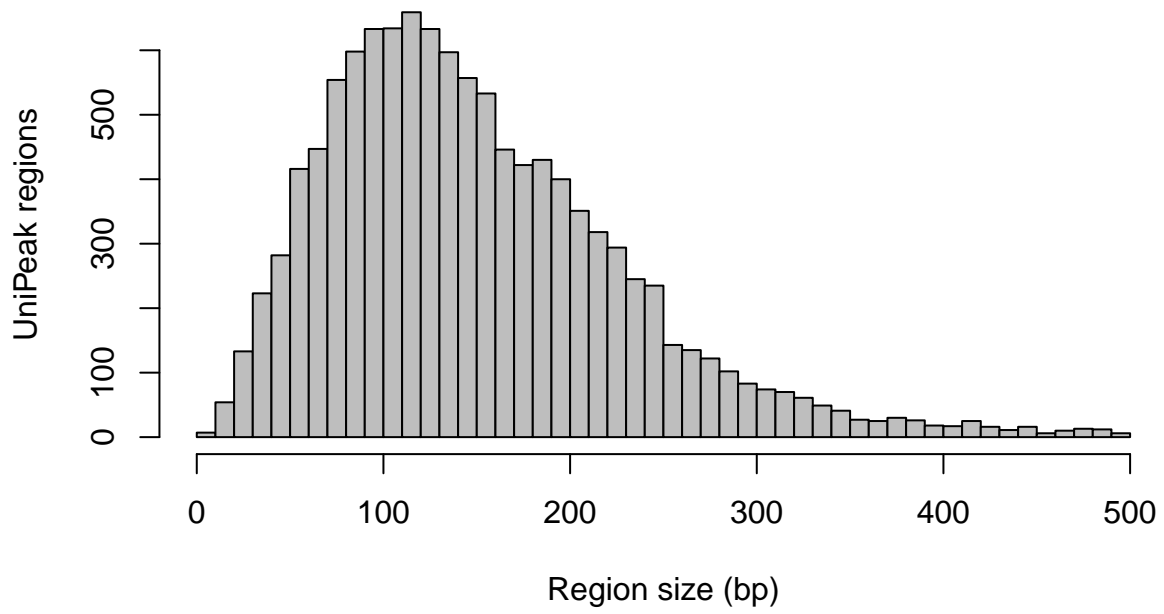

### Transcription factors

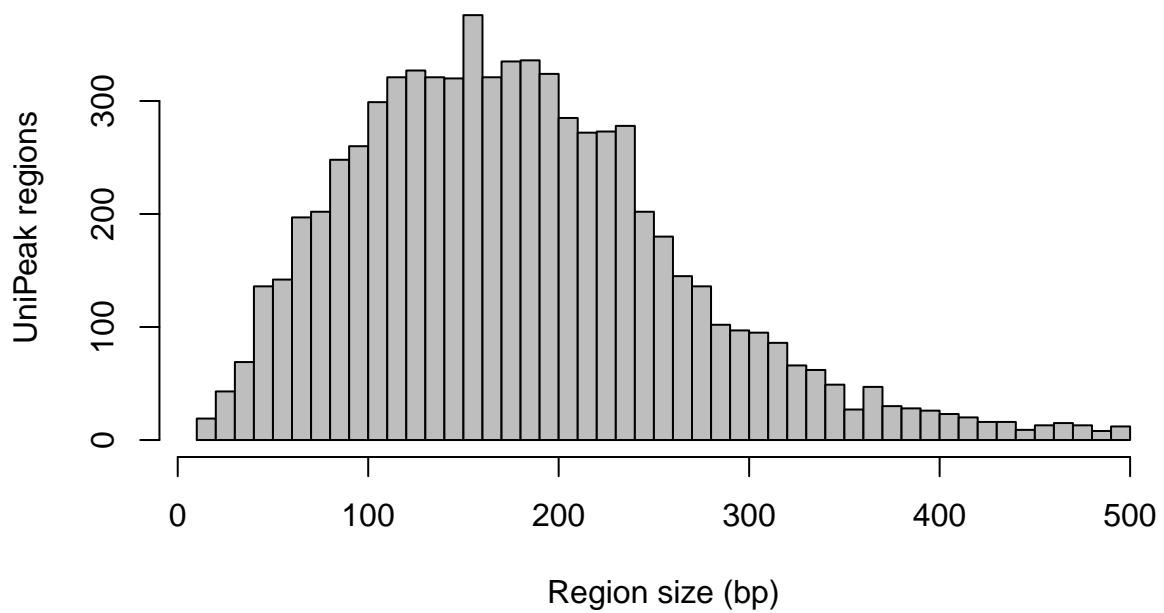

Figure S3

### GM12878

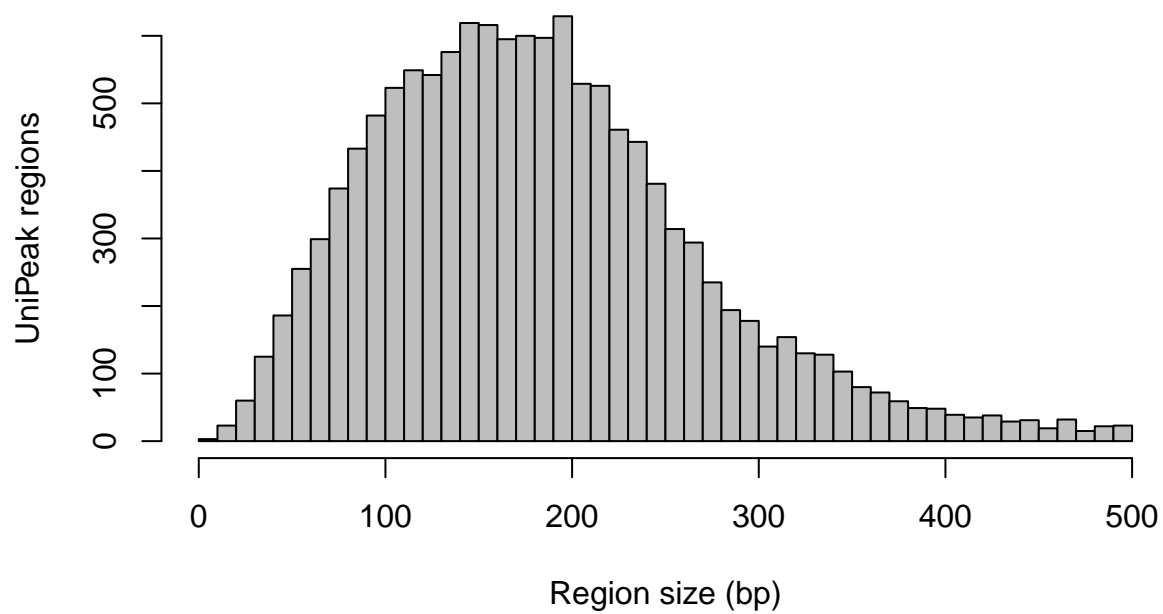

### K562

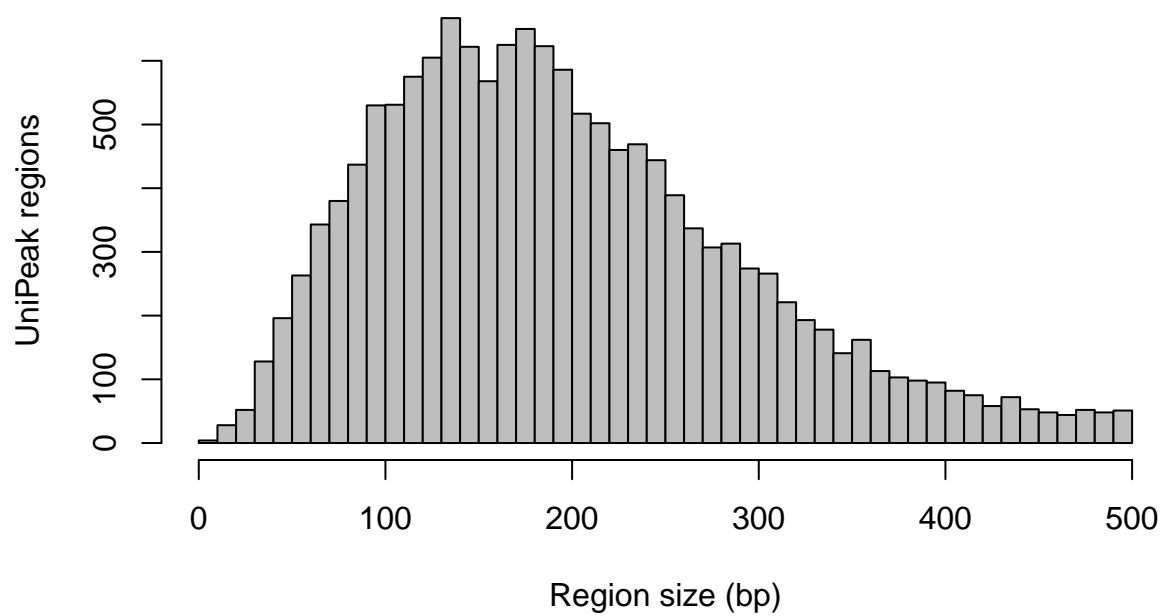

Figure S3

## HepG2

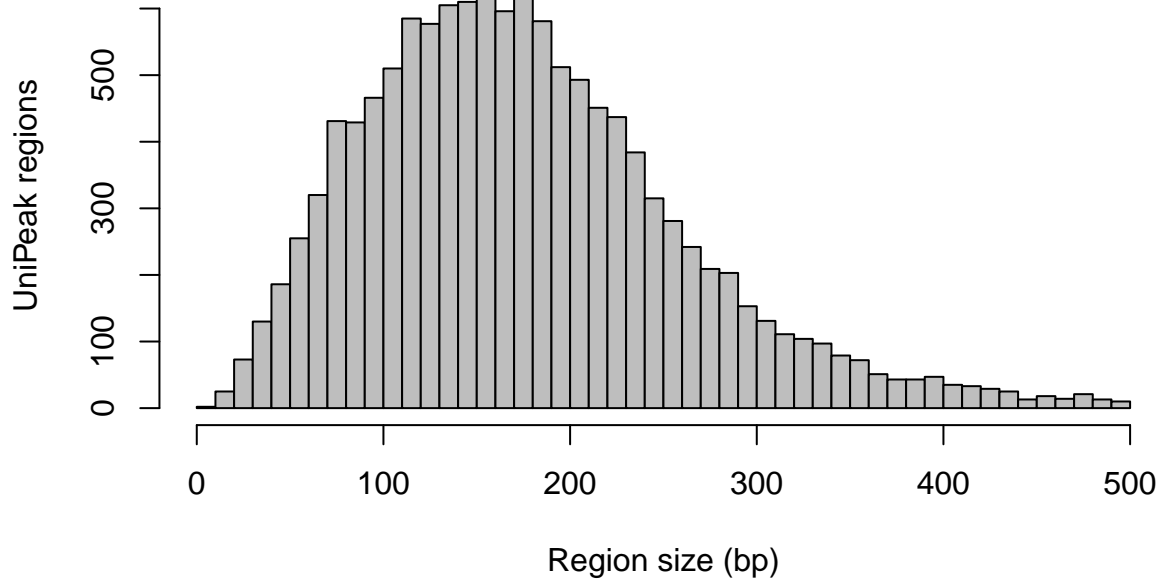

## H1-hESC

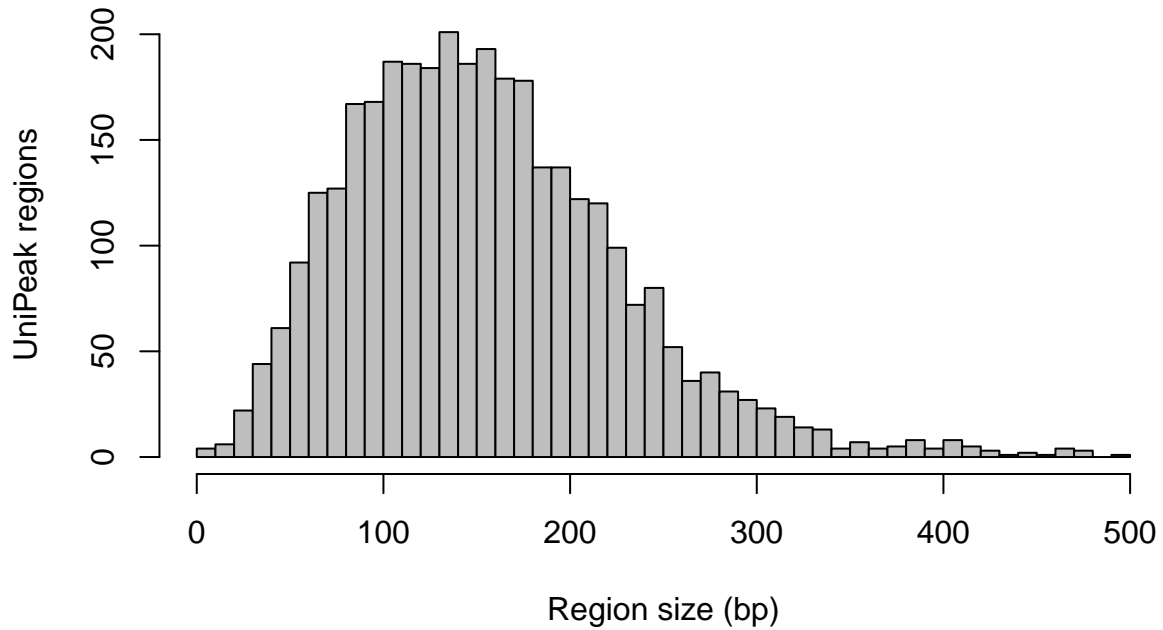

Figure S3

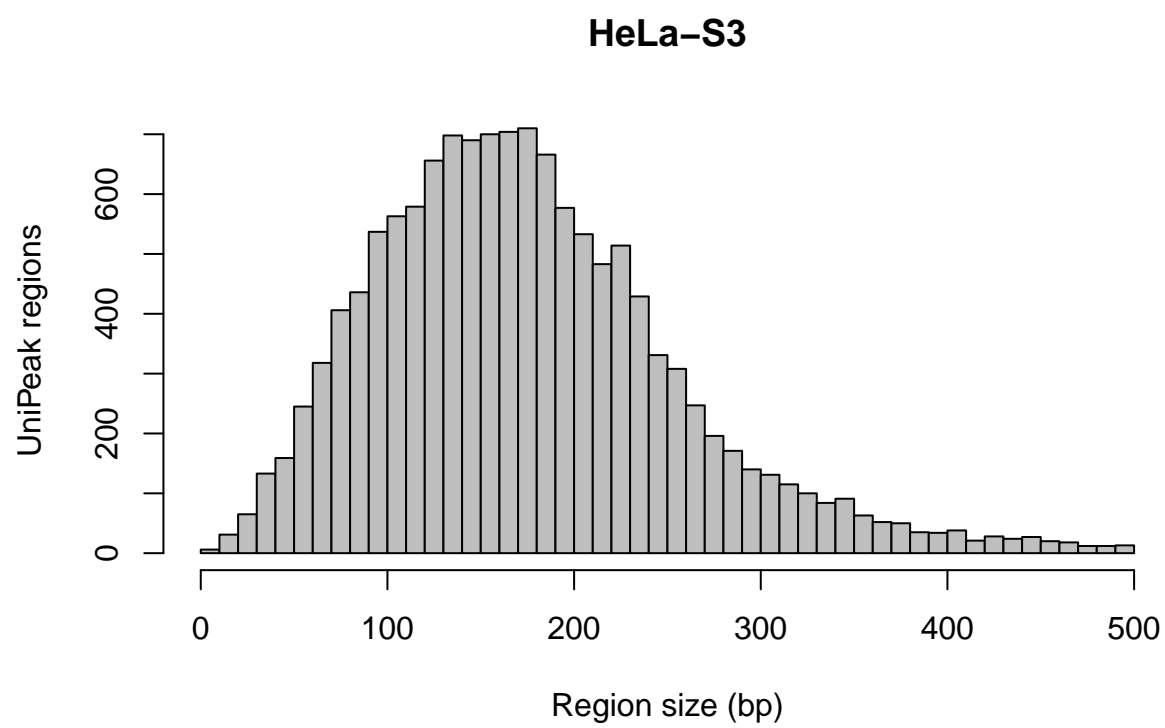

Figure S3: Distribution of UniPeak region sizes in all analyses.

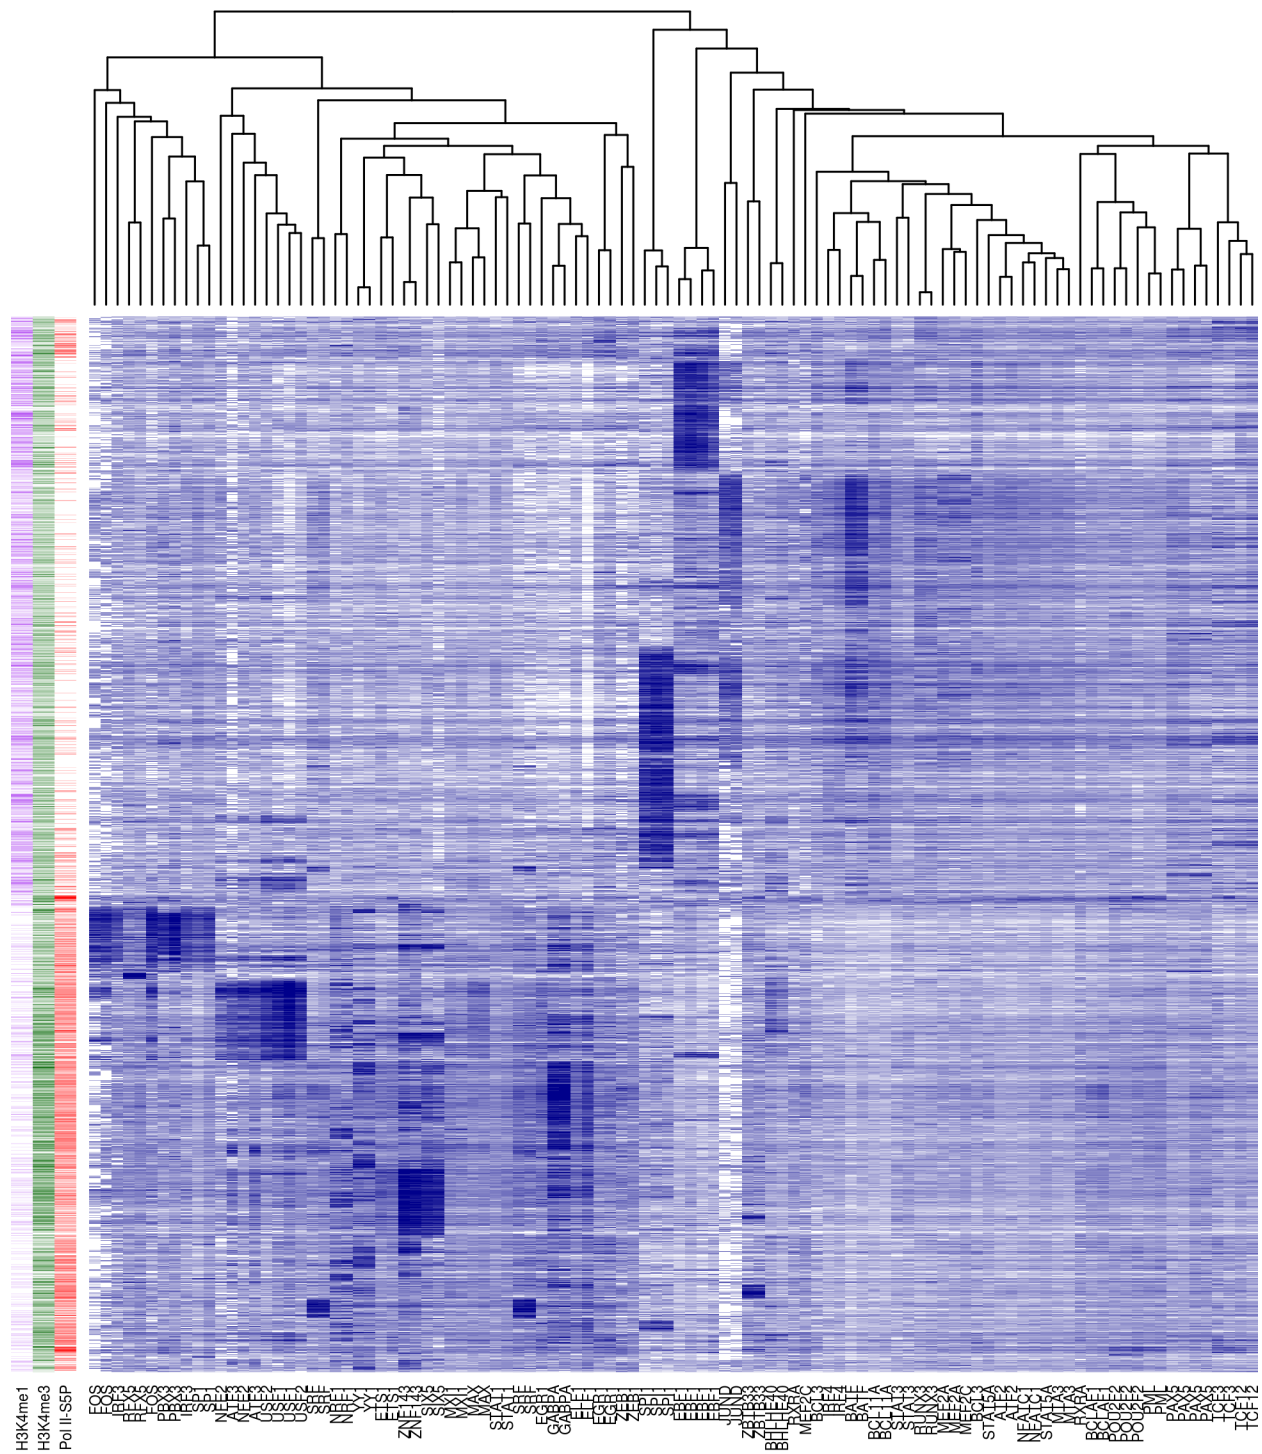

Figure S4





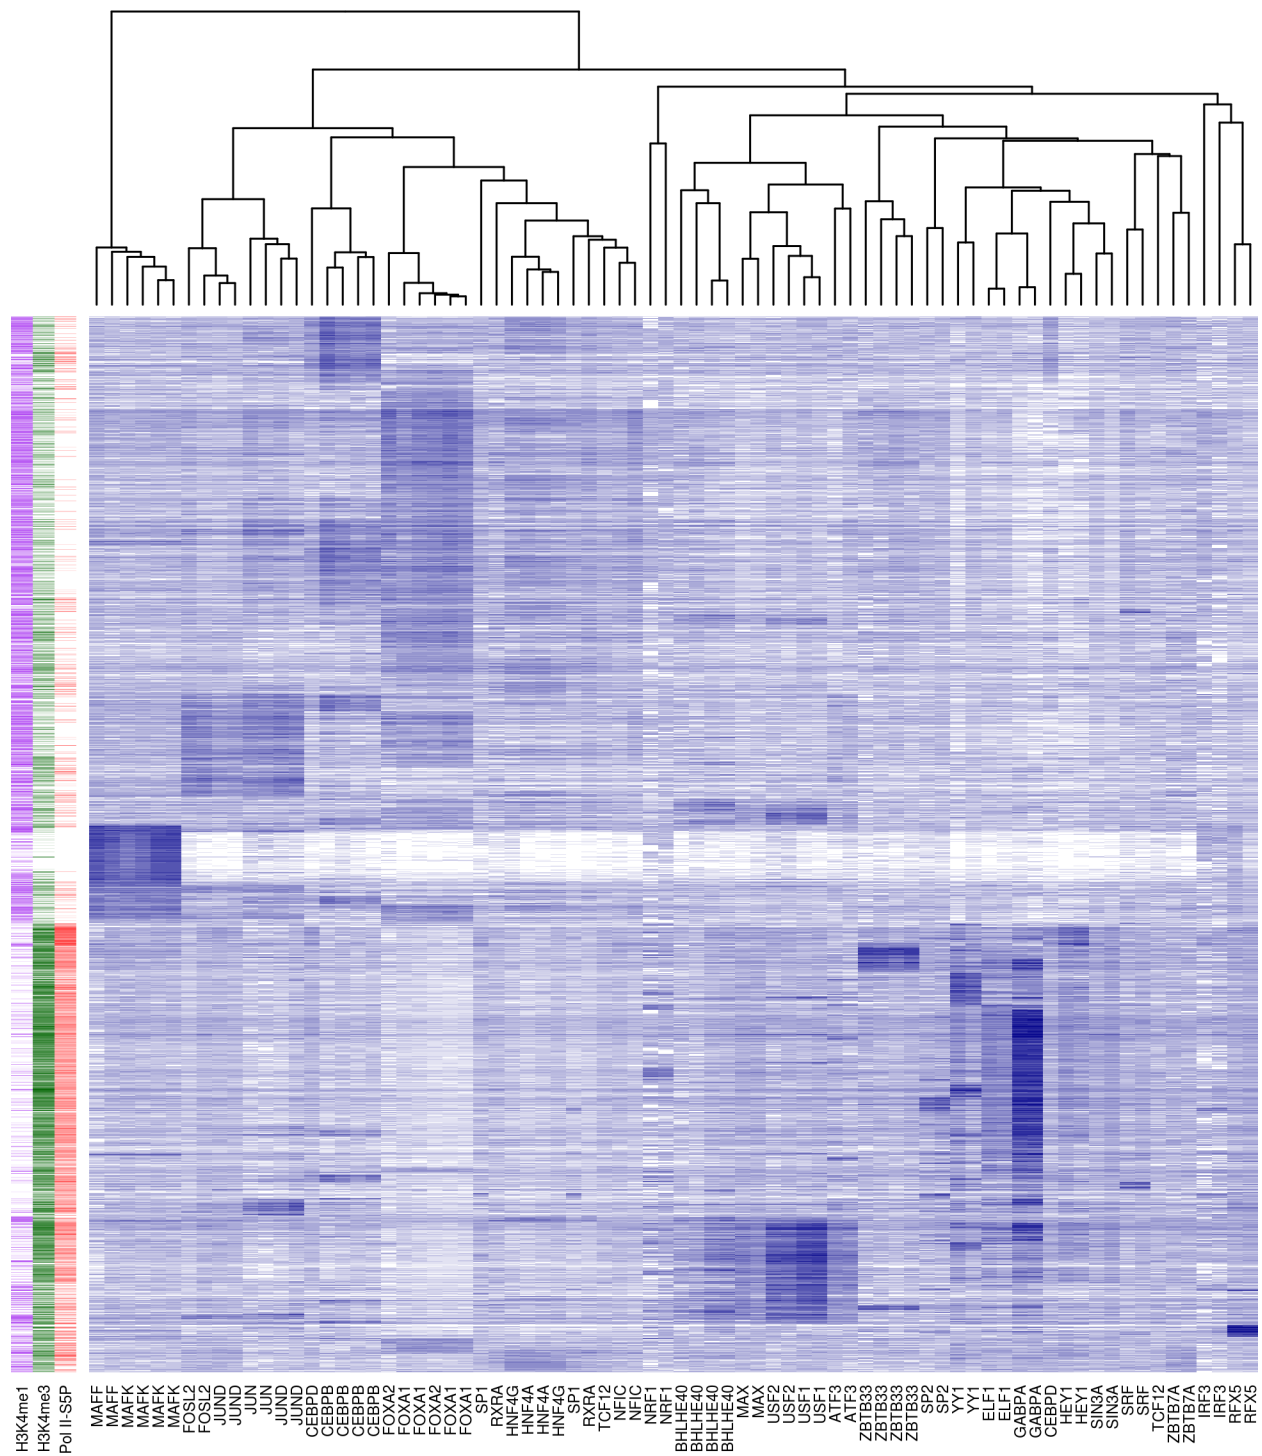

Figure S4

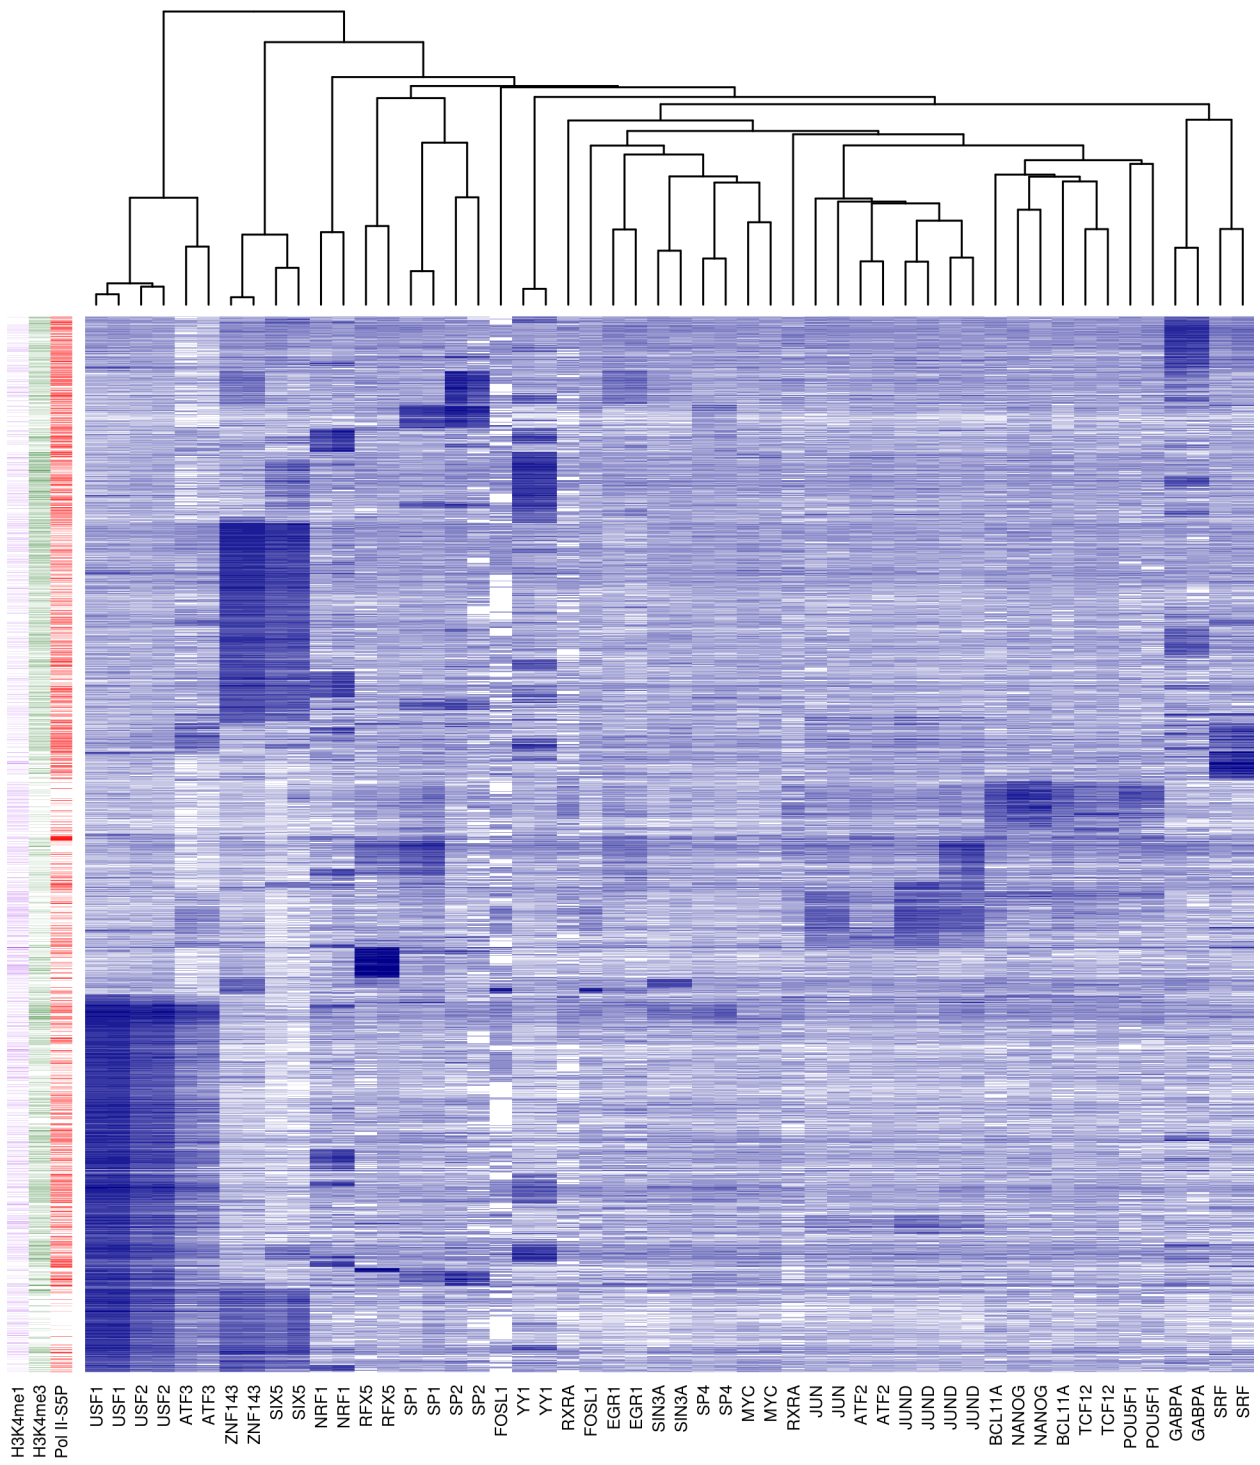

Figure S4

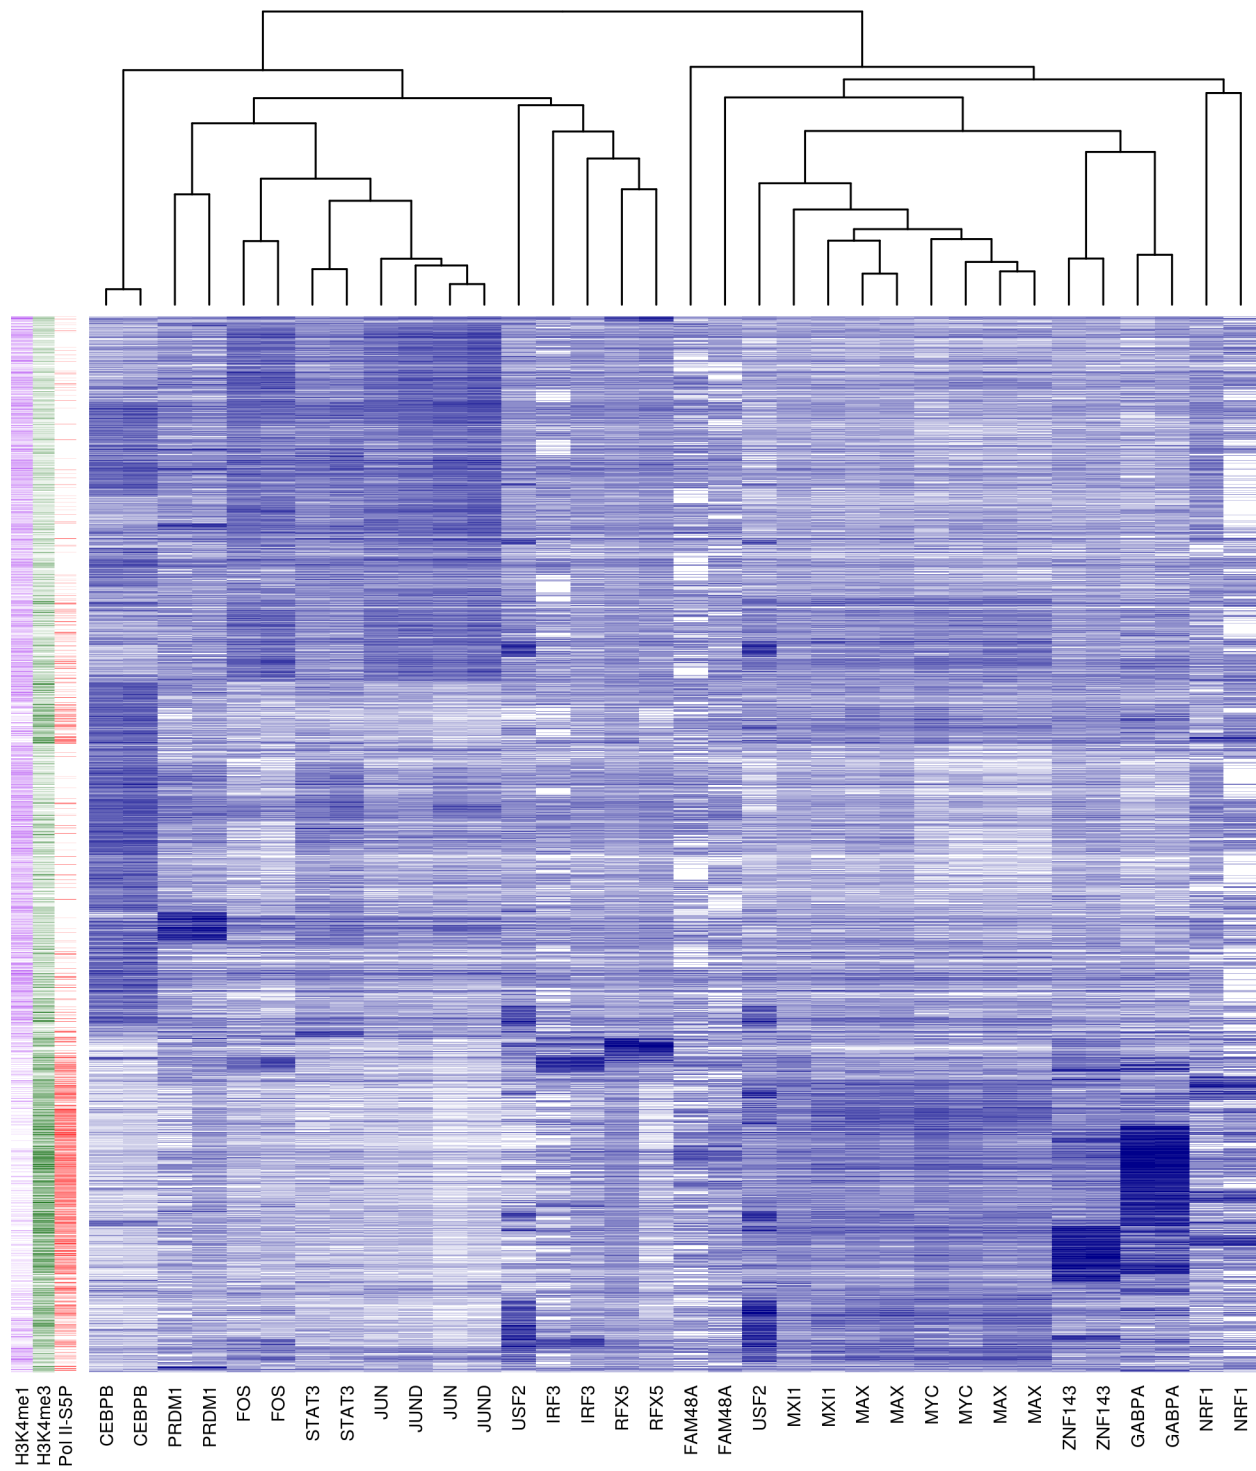

Figure S4: Clustered heatmaps for cell-specific analyses. S4a: GM12878. S4b: K562. S4c: HepG2. S4d: H1-hESC. S4e: HeLa-S3.

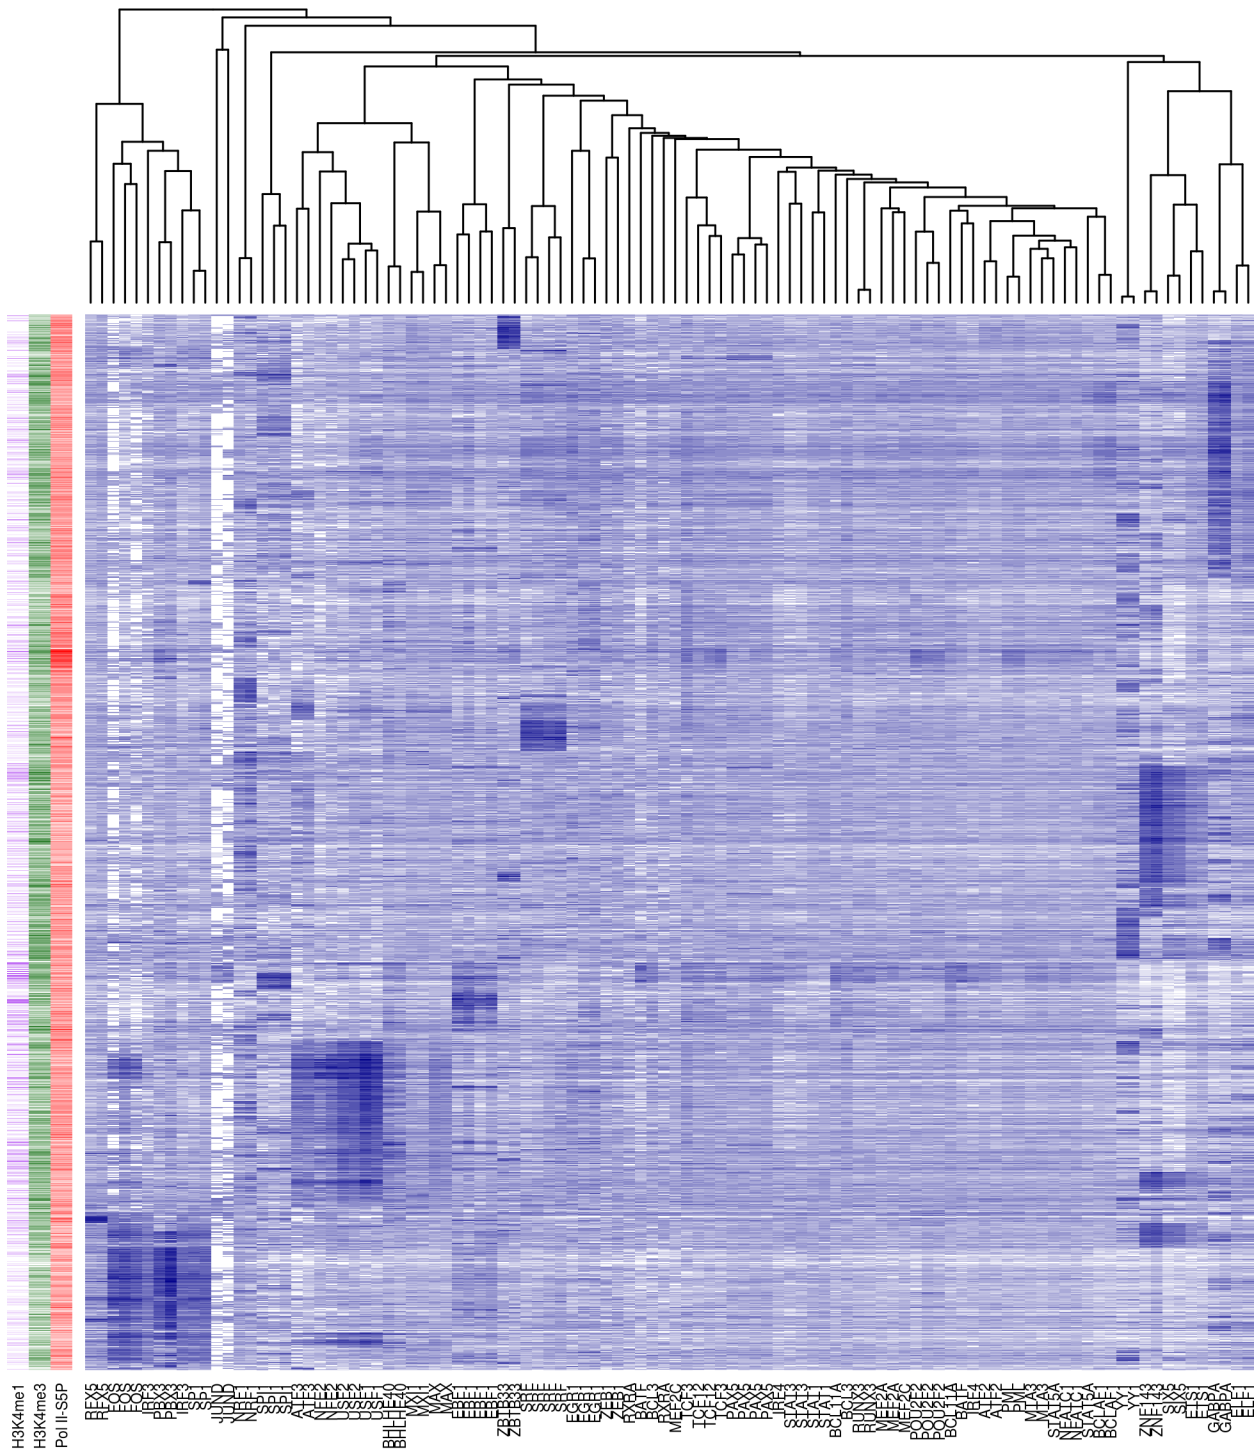



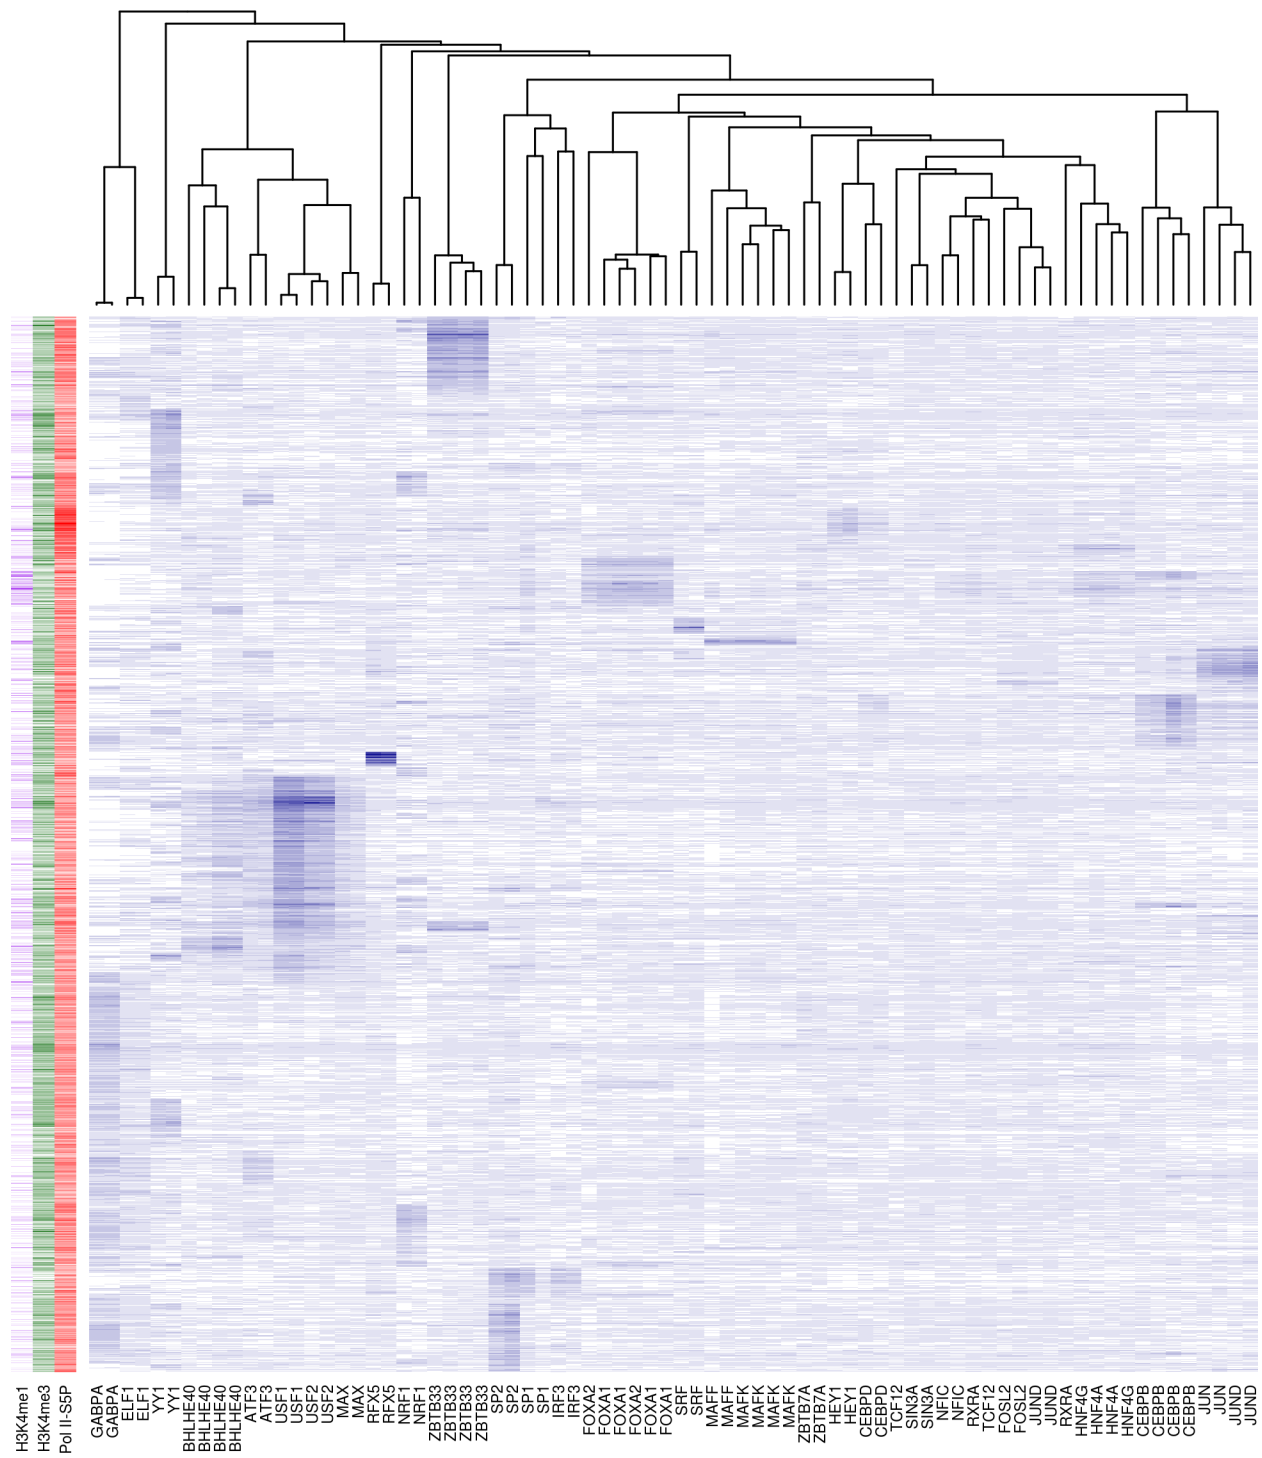

Figure S5

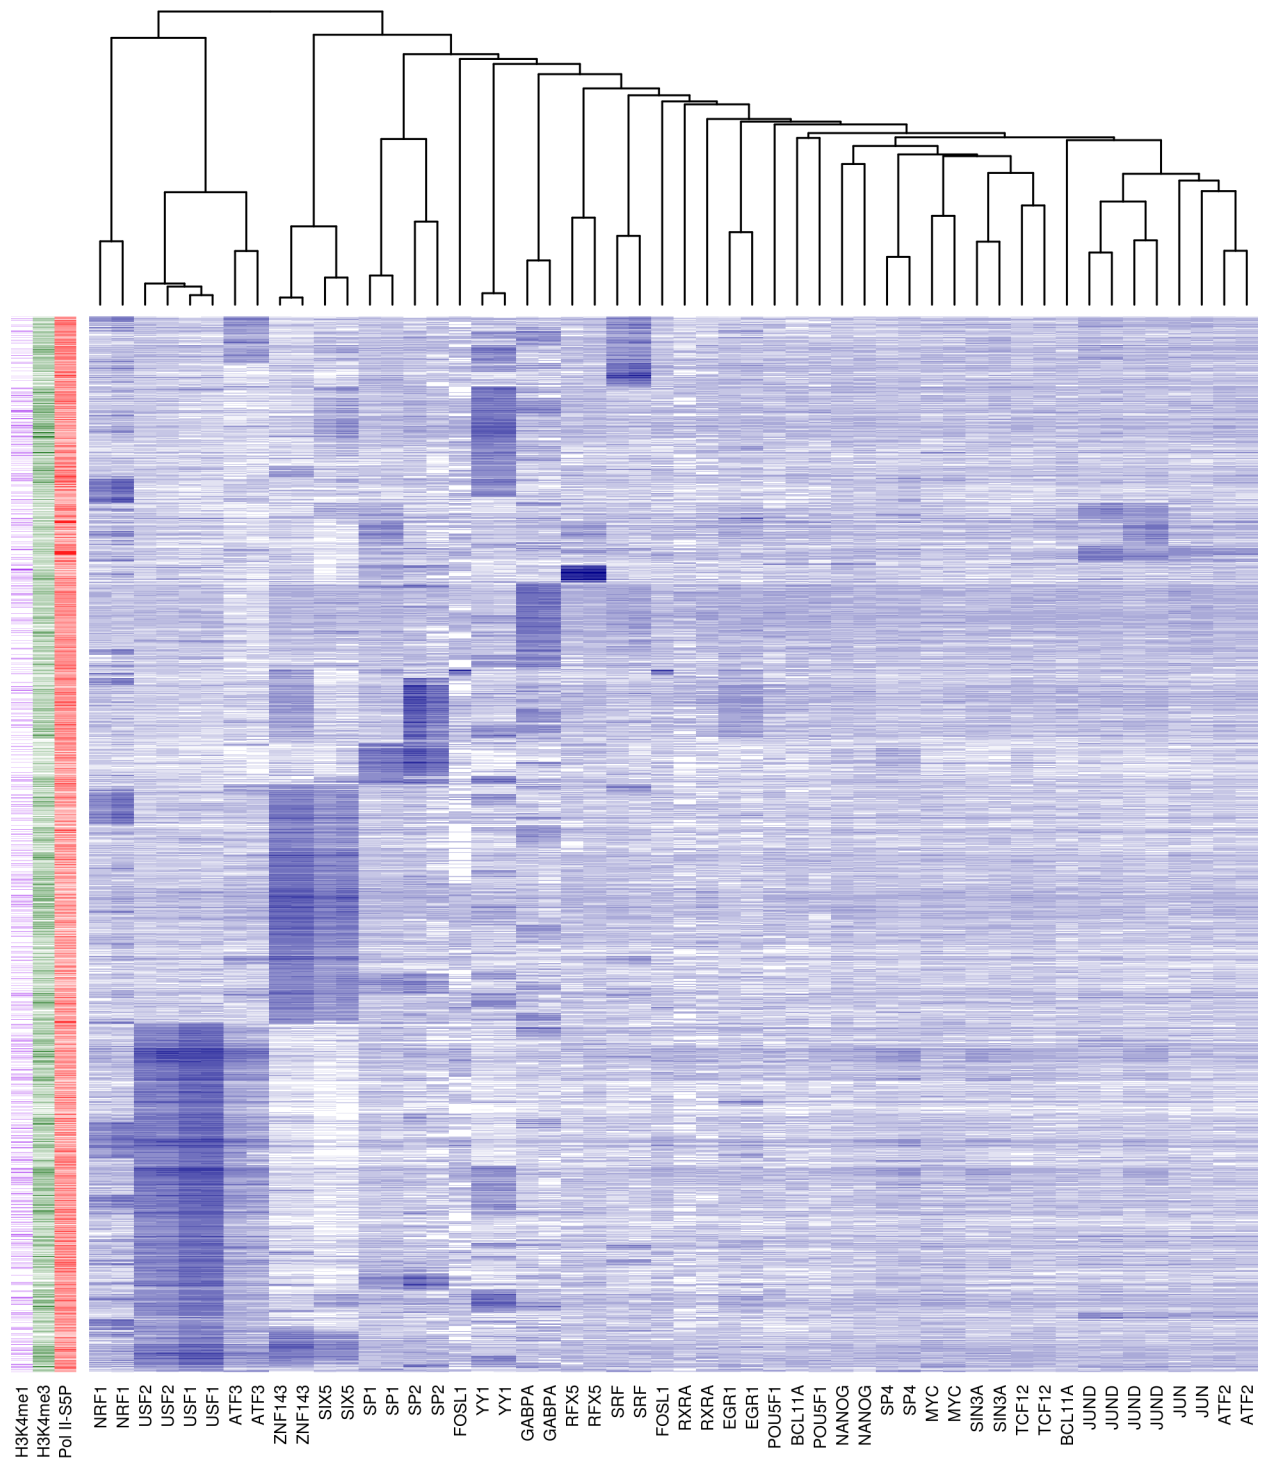

Figure S5



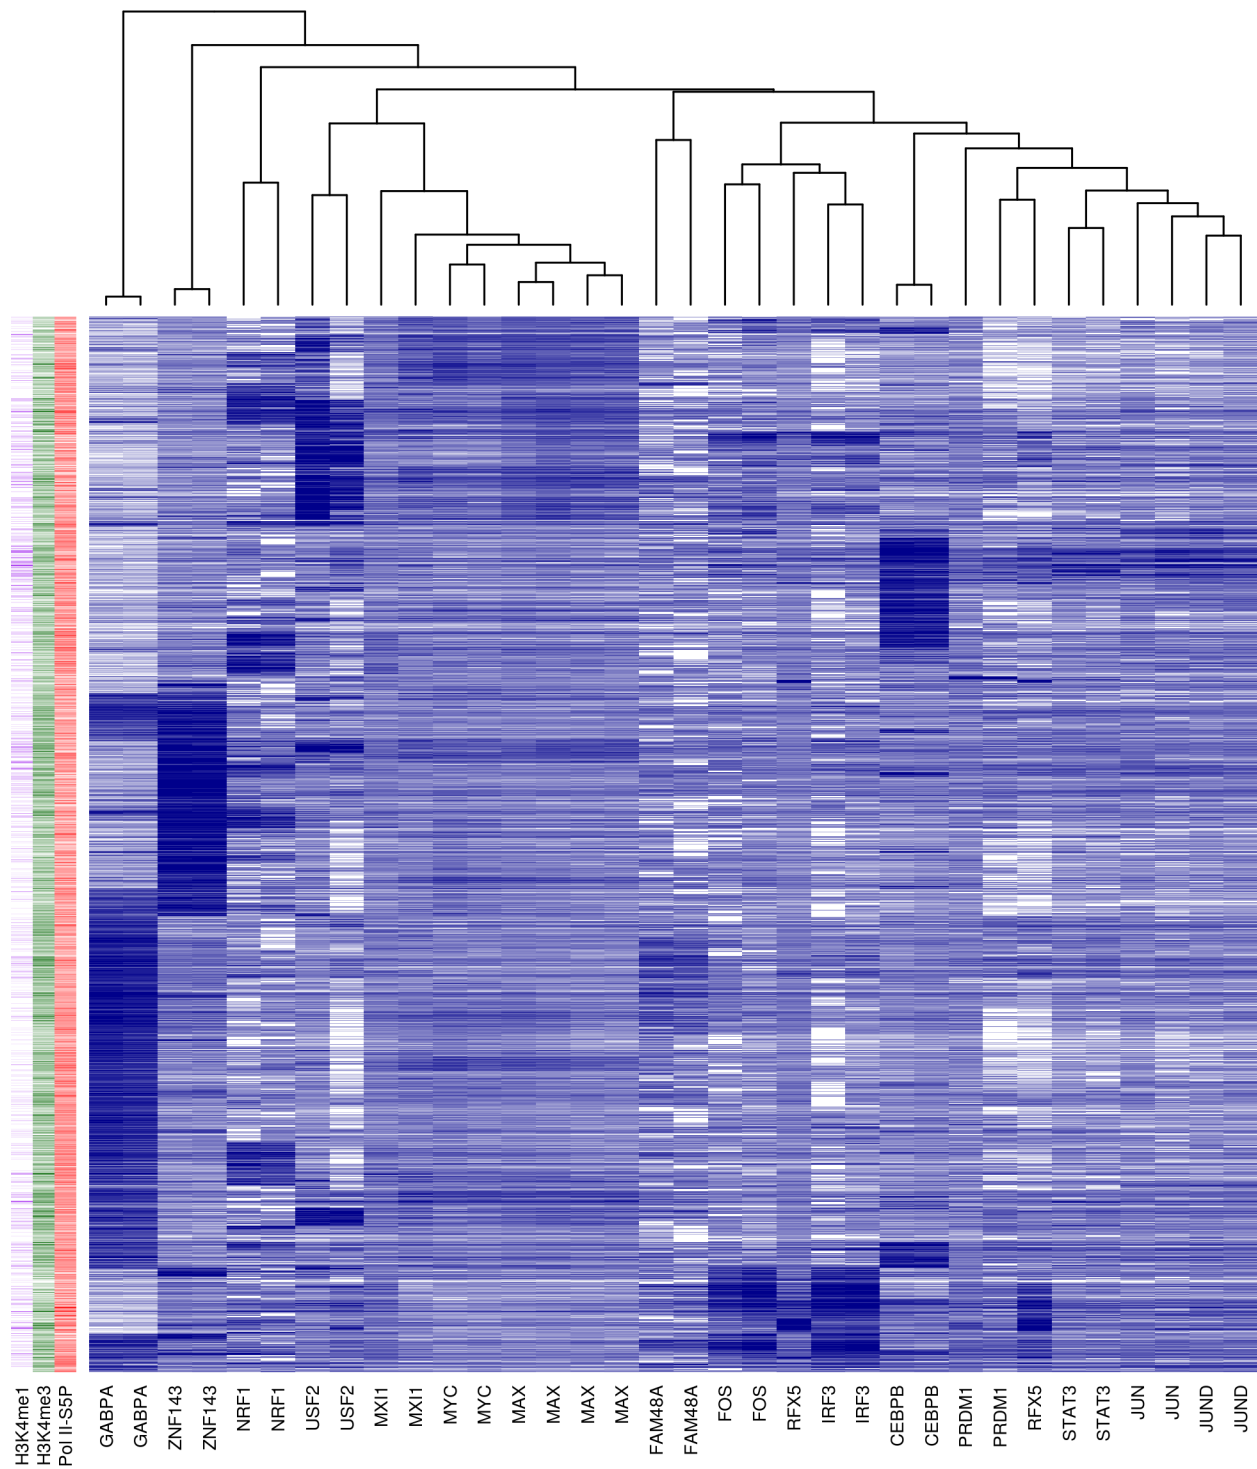

Figure S5: Clustered heatmaps for cell-specific analyses, consensus promoters only. S5a: GM12878. S5b: K562. S5c: HepG2. S5d: H1-hESC. S5e: HeLa-S3.

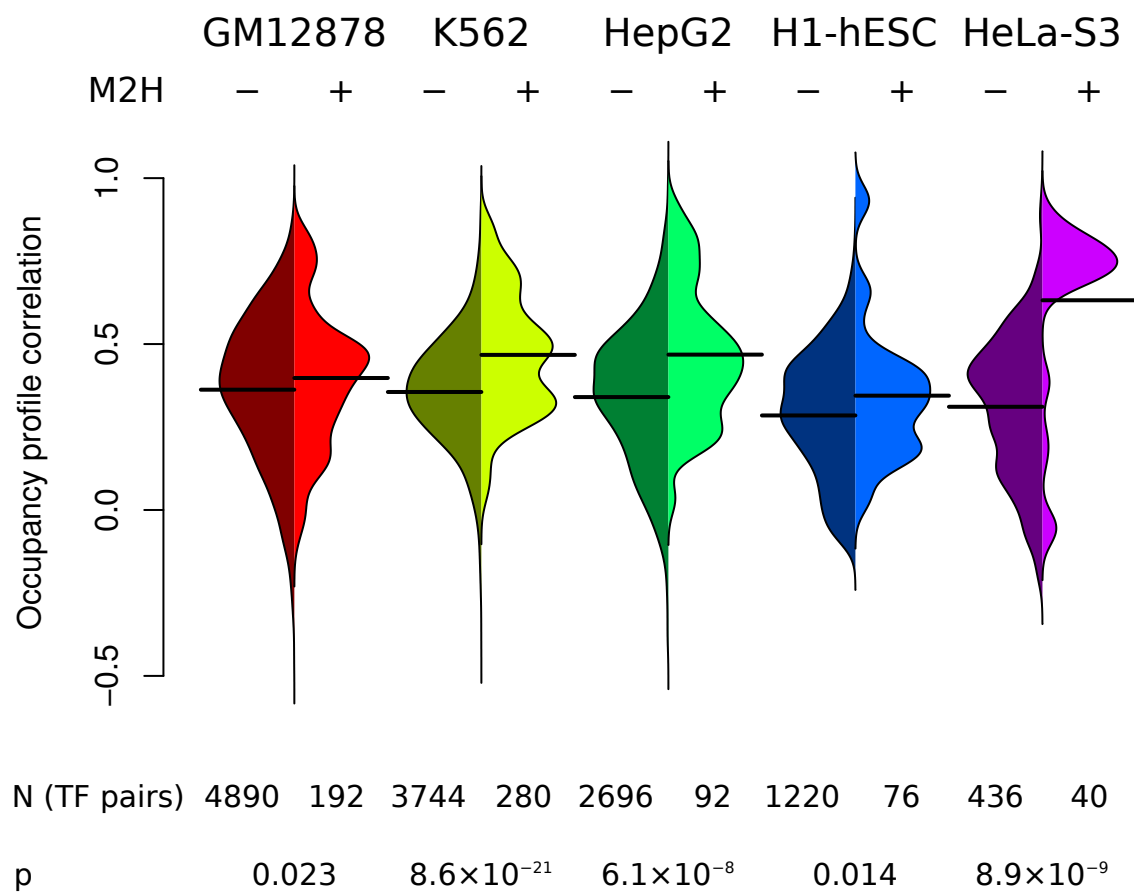

Figure S6: Occupancy profile correlations of interacting and non-interacting TFs. All pairwise correlations of occupancy profiles across all regions are plotted for each cell type, grouped by whether a mammalian two-hybrid (M2H) screen found the two TFs capable of directly binding each other.  $p$ -values are from the  $t$ -test.





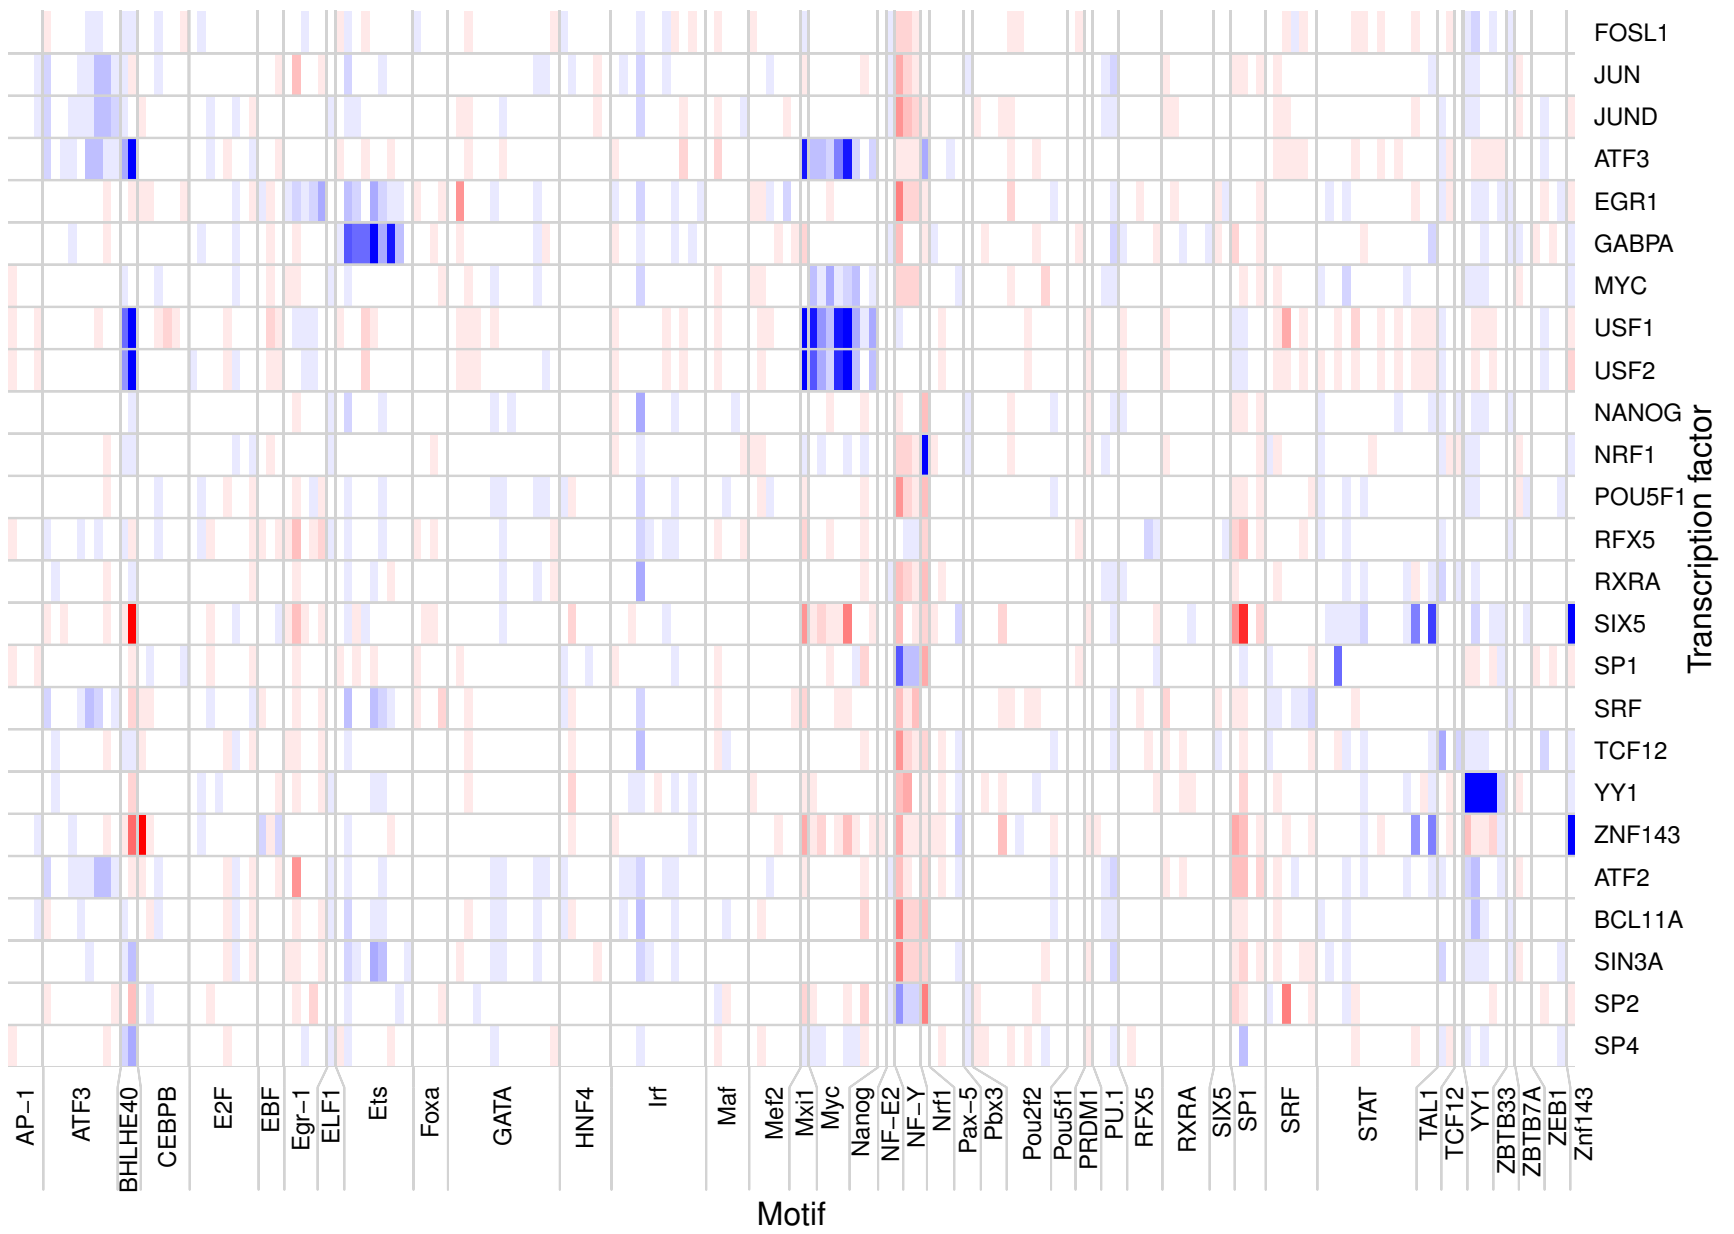

Figure S7

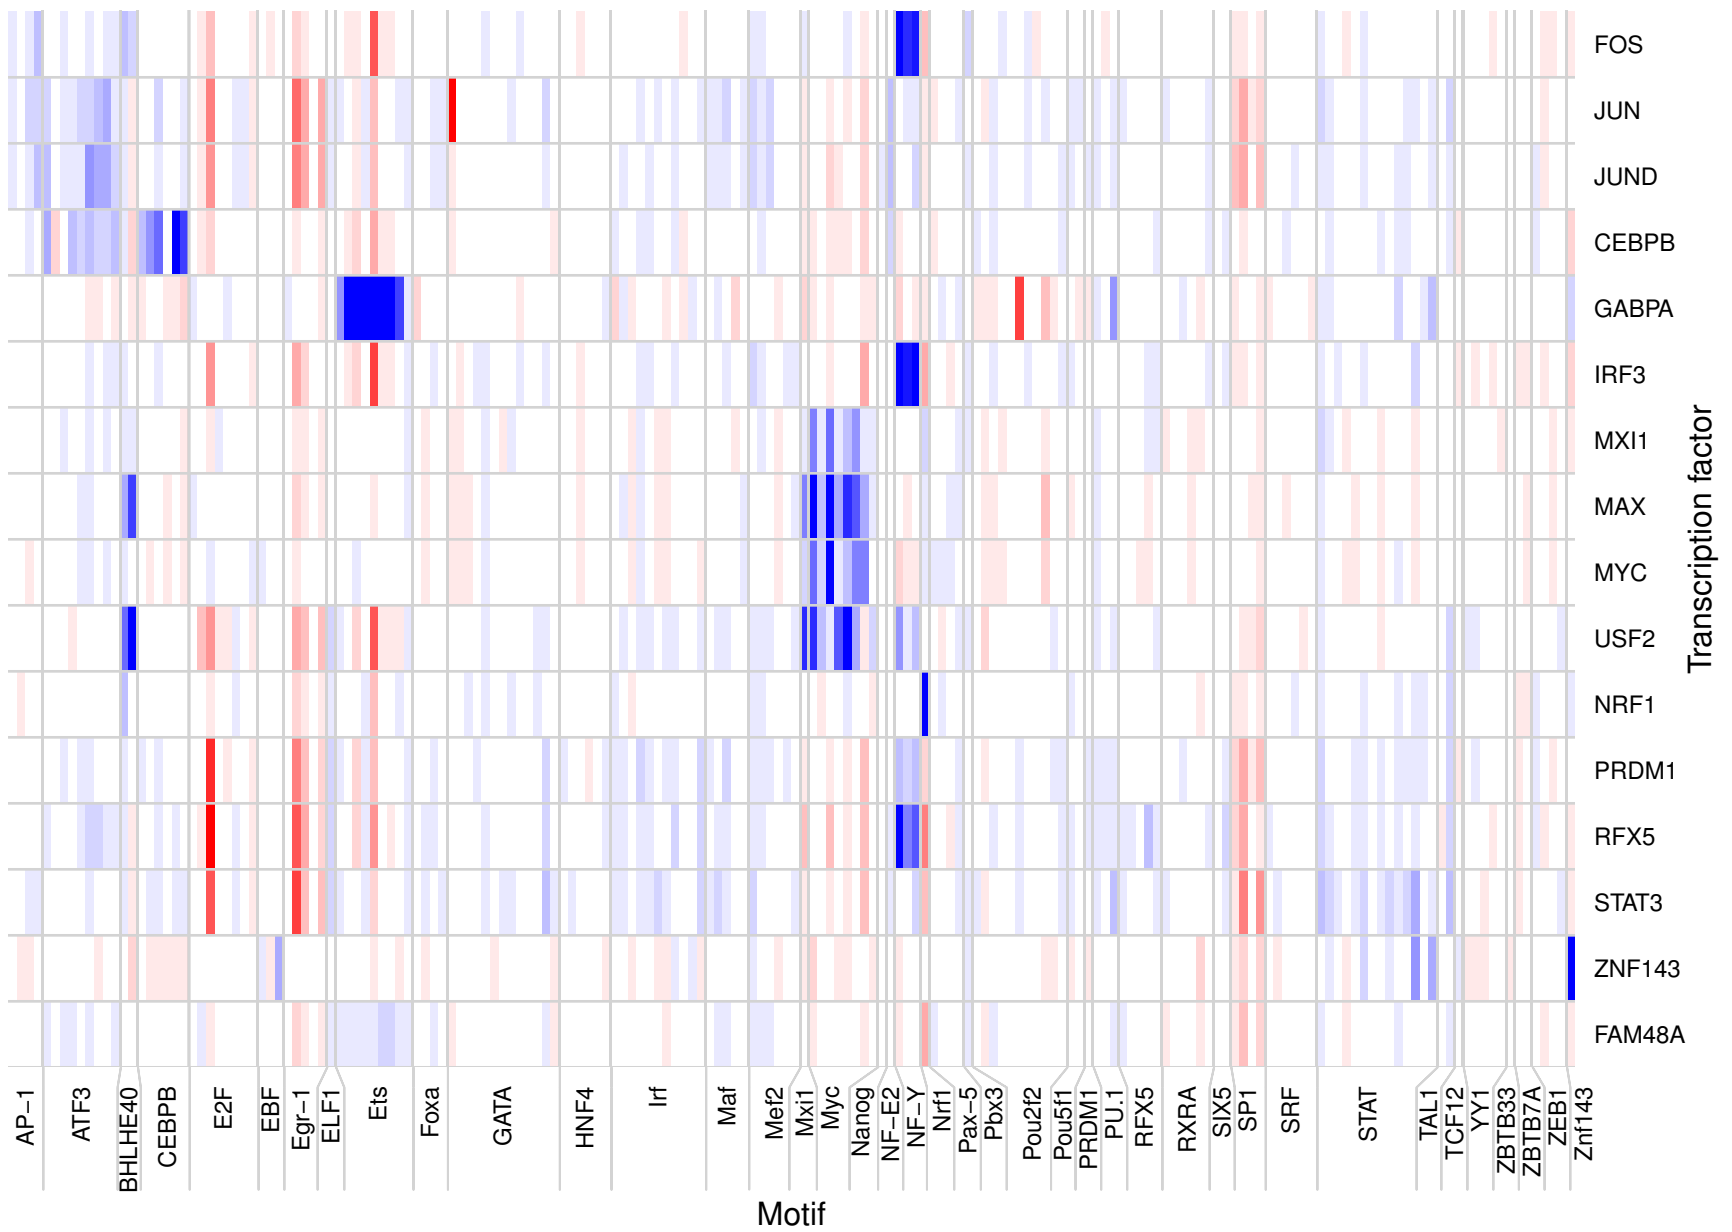

Figure S7: Sequence motifs vs. TF occupancy, by cell. S7a: K562. S7b: HepG2. S7c: H1-hESC. S7d: HeLa-S3.

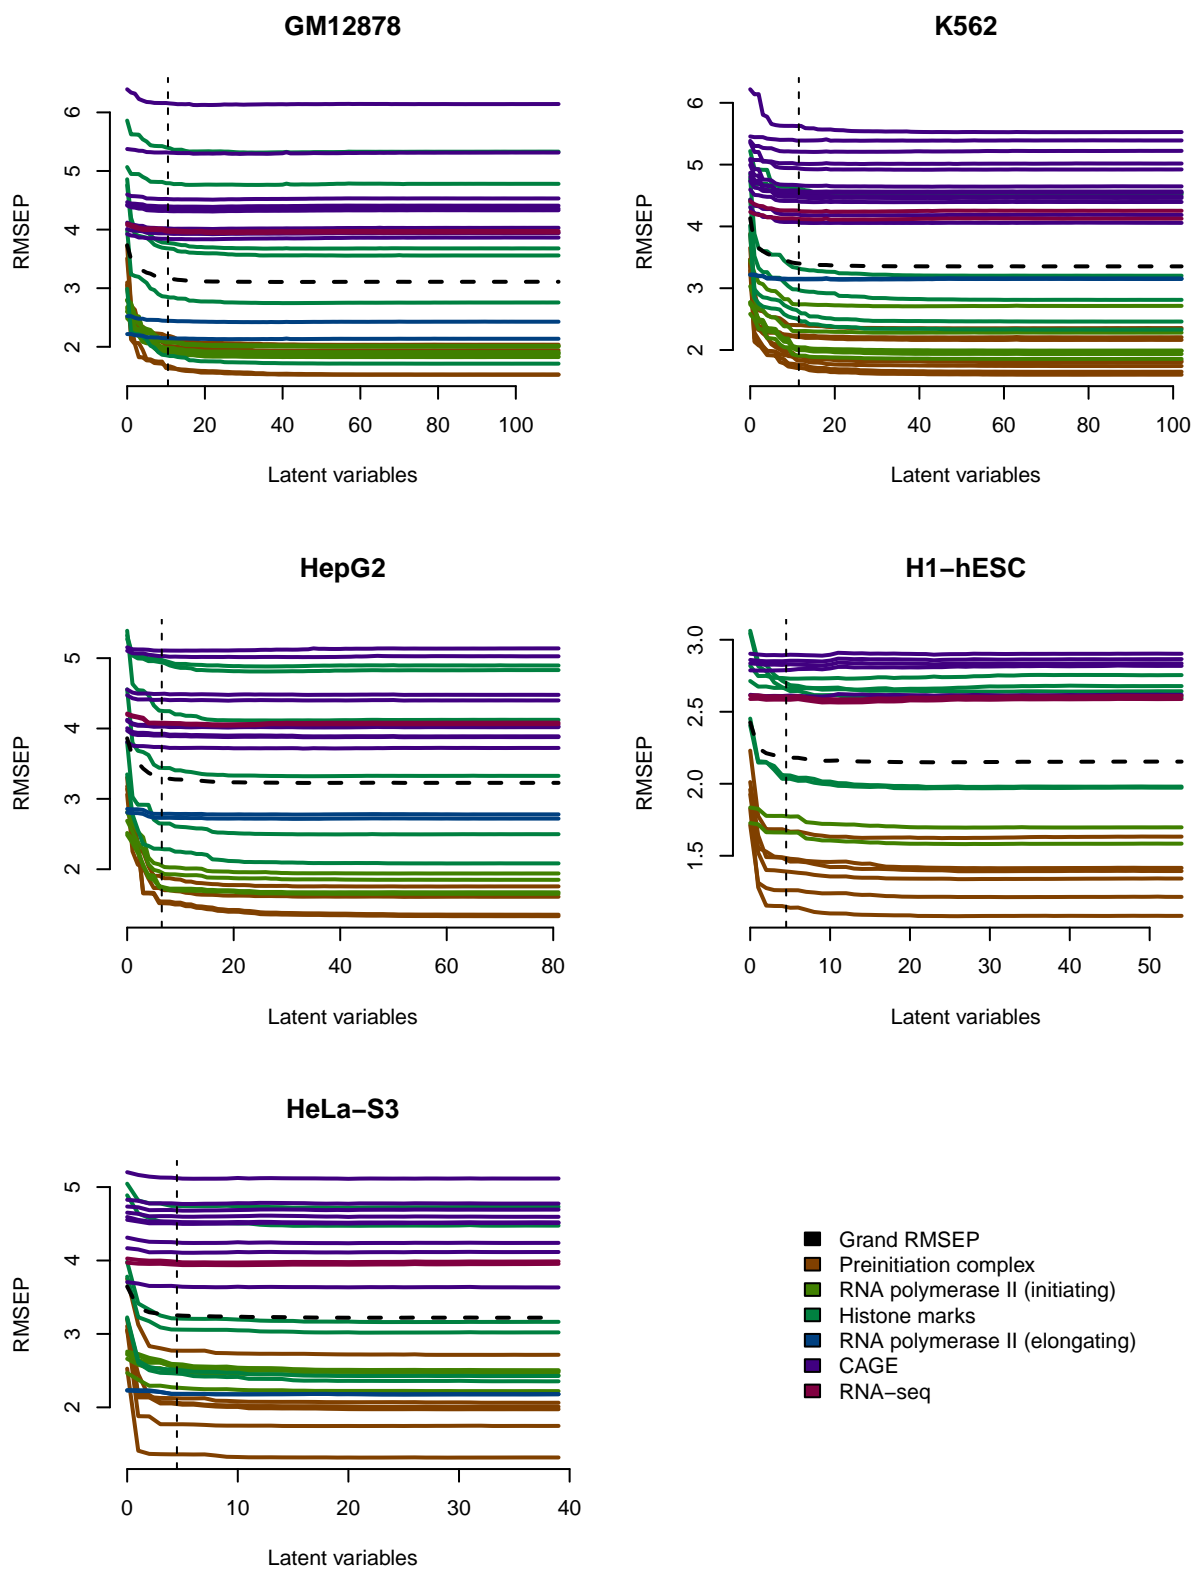

Figure S8: Root-mean-square error of prediction for partial least-squares regression analyses.

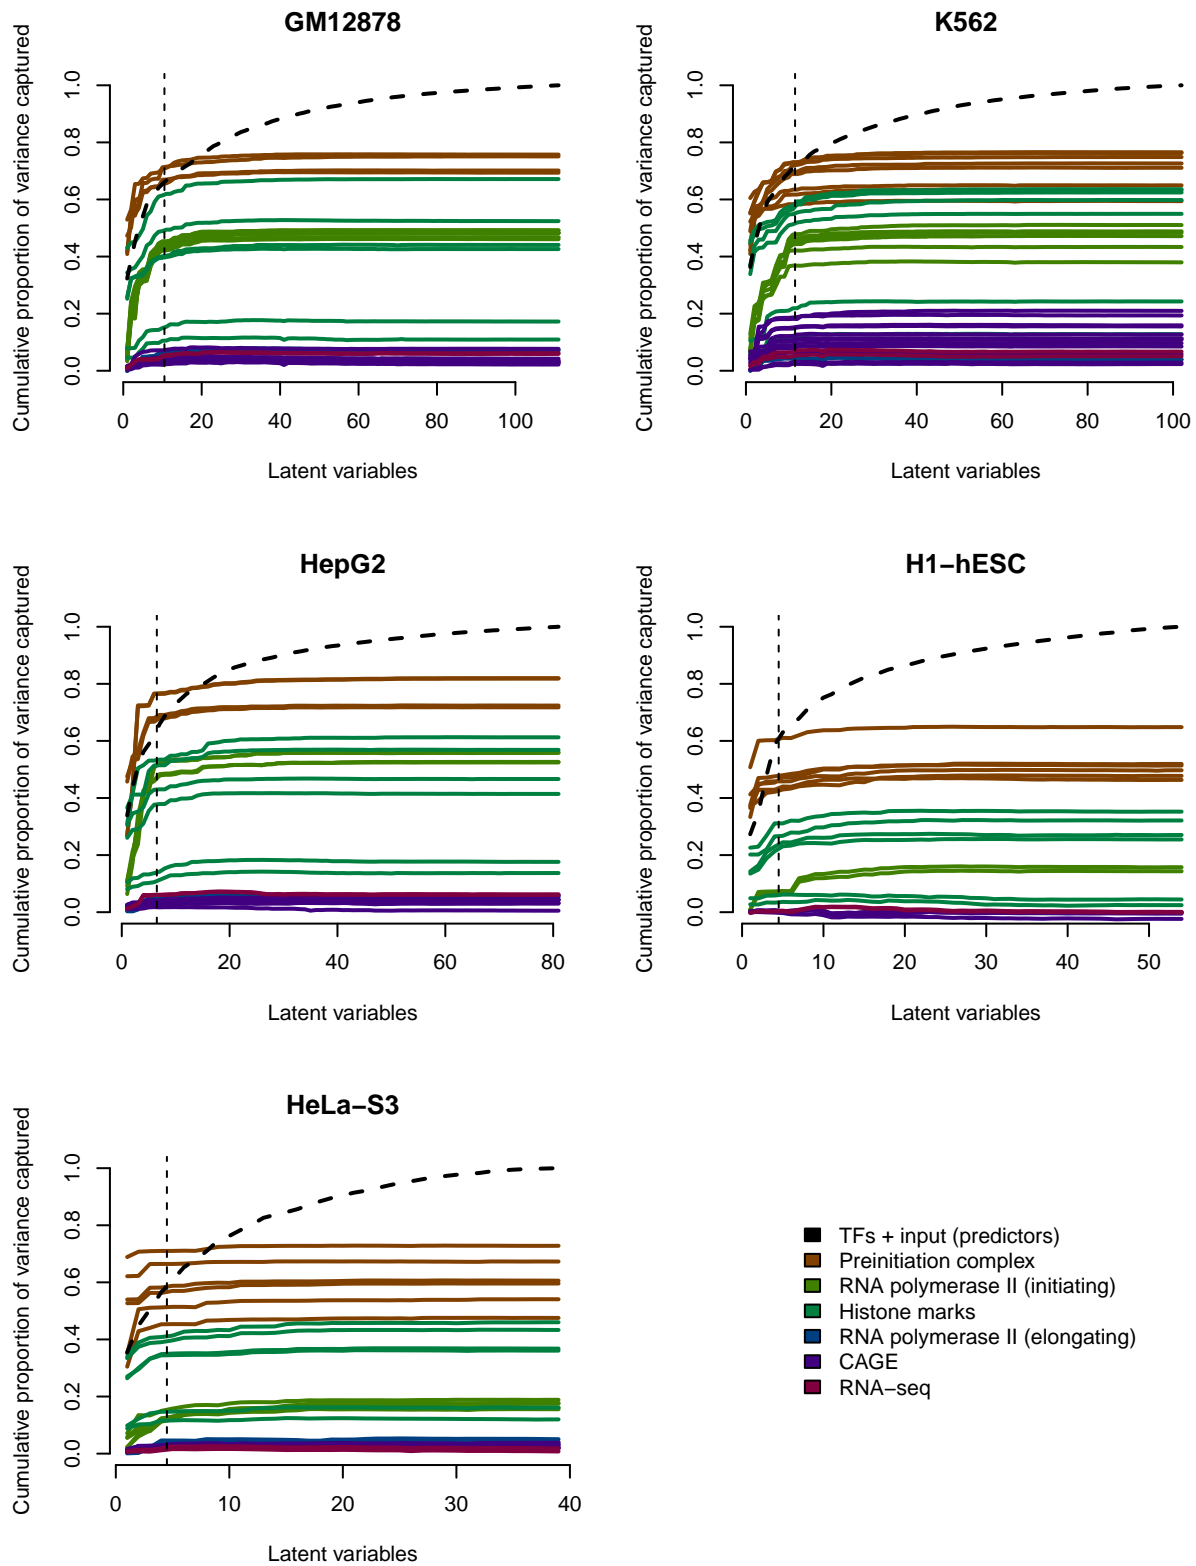

Figure S9: Variance captured by partial least-squares regression analyses.



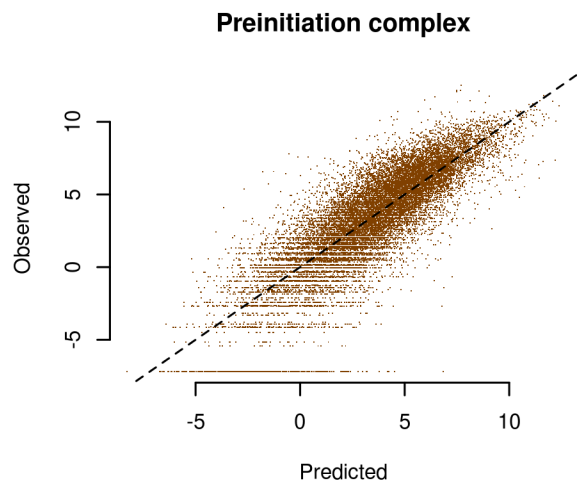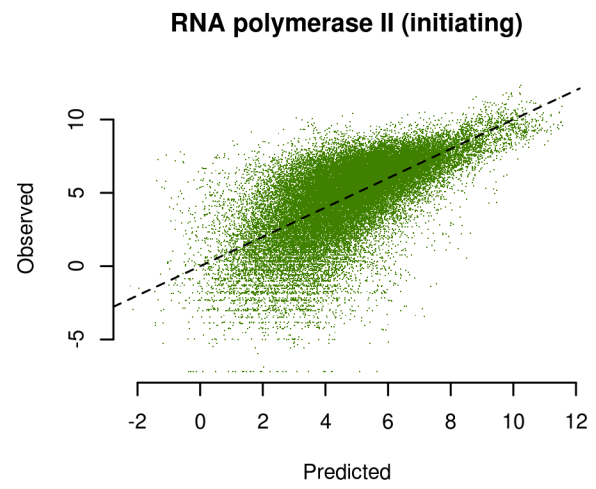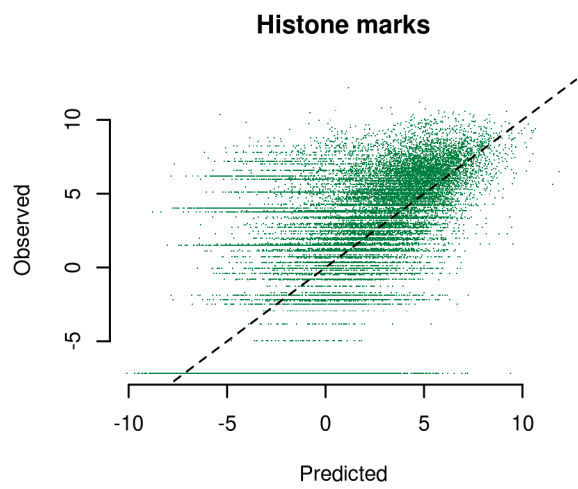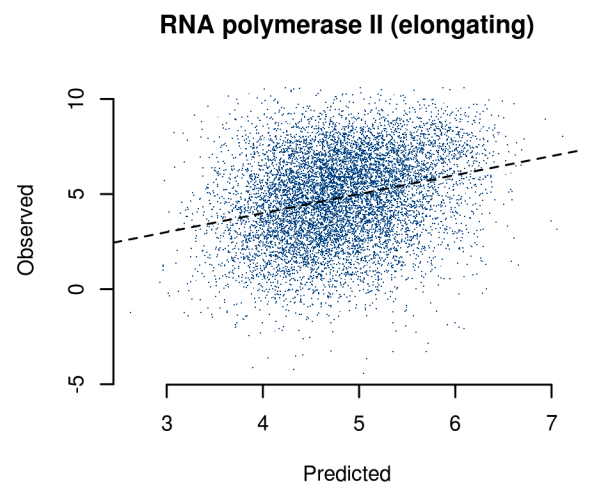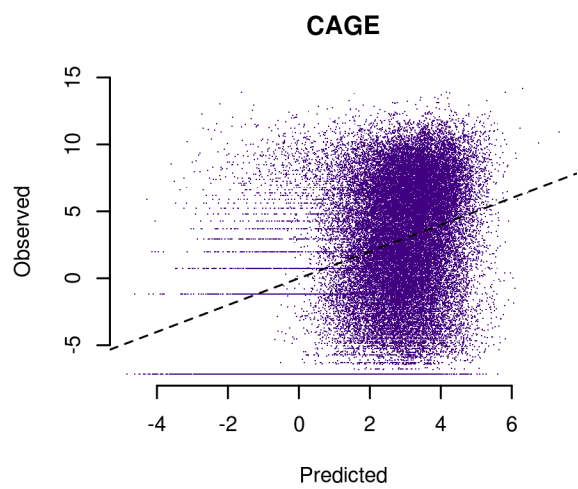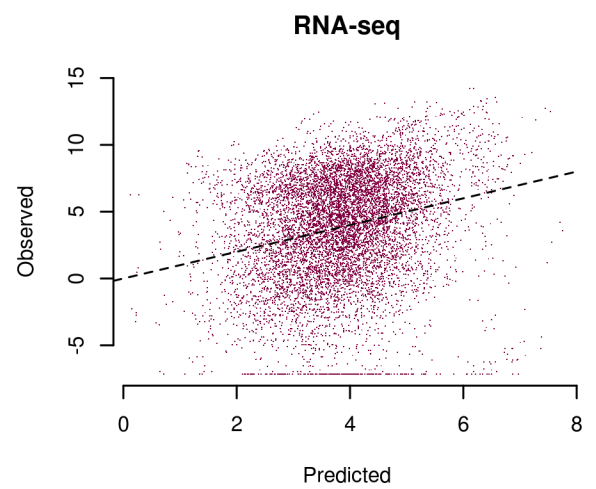

Figure S10

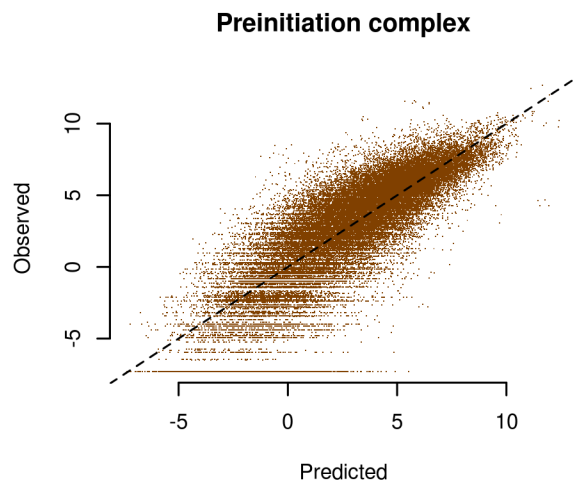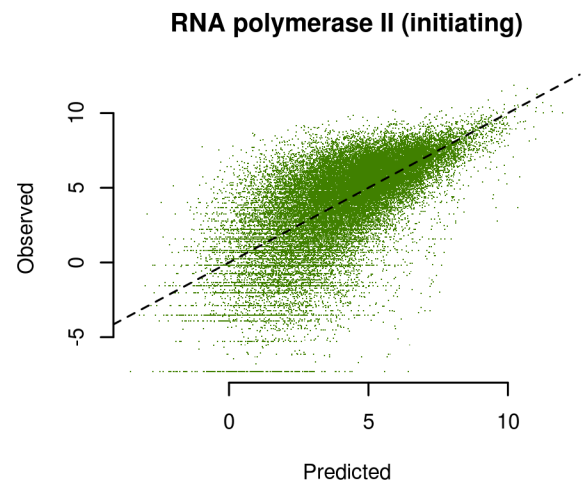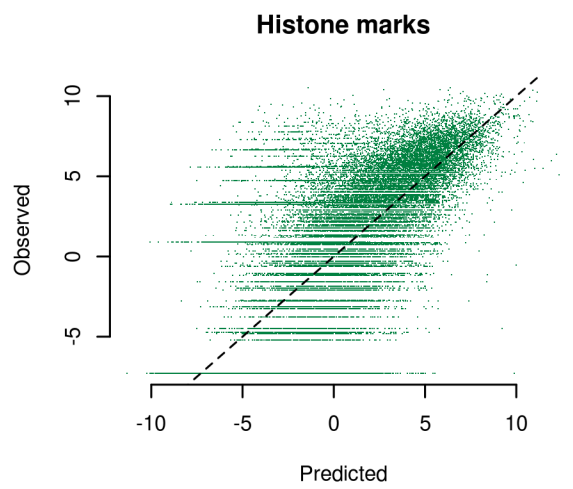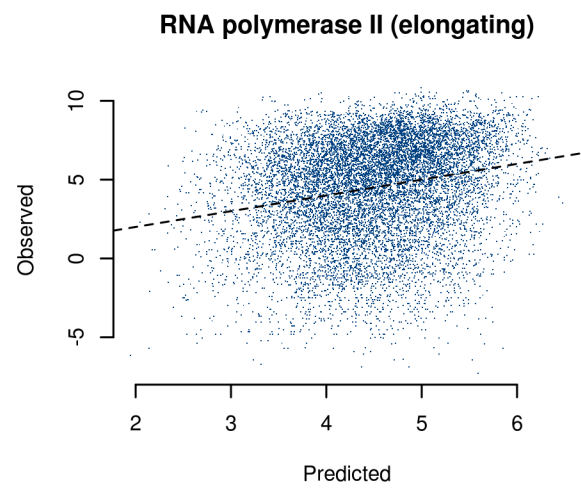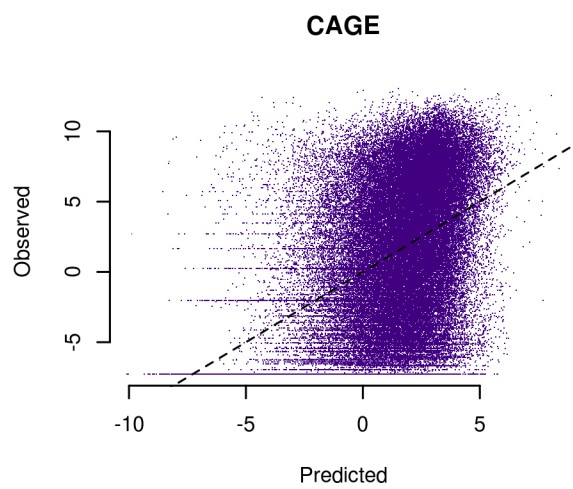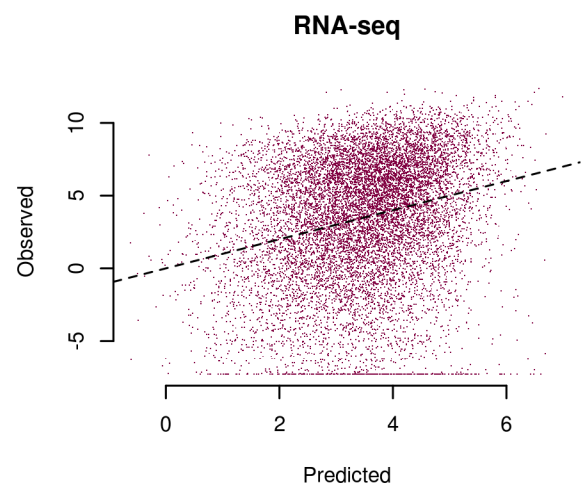

Figure S10

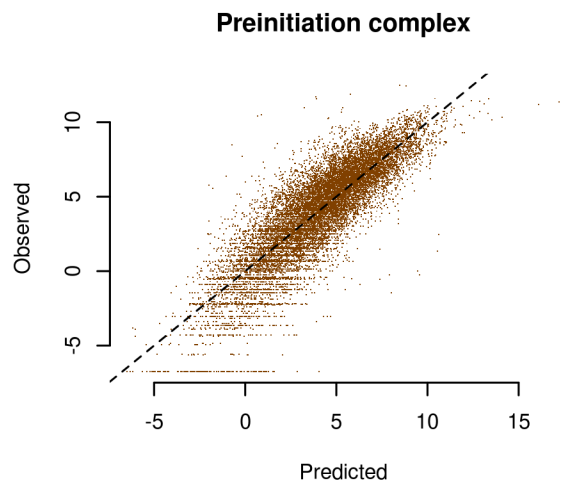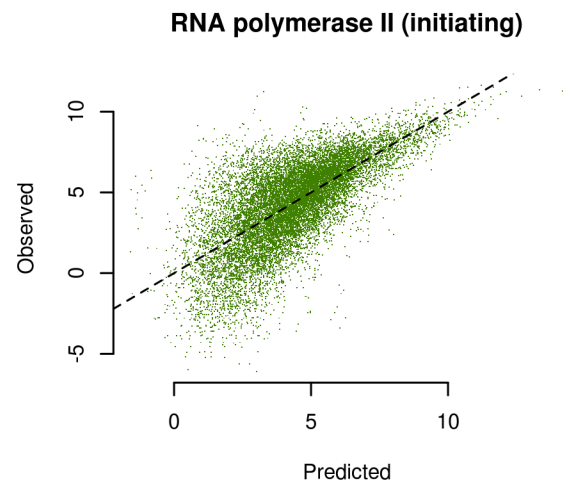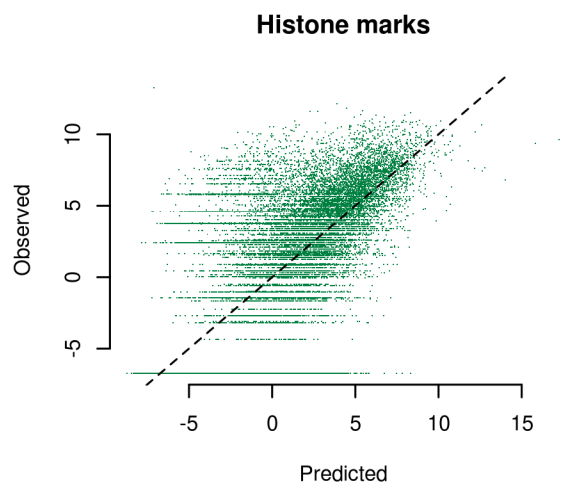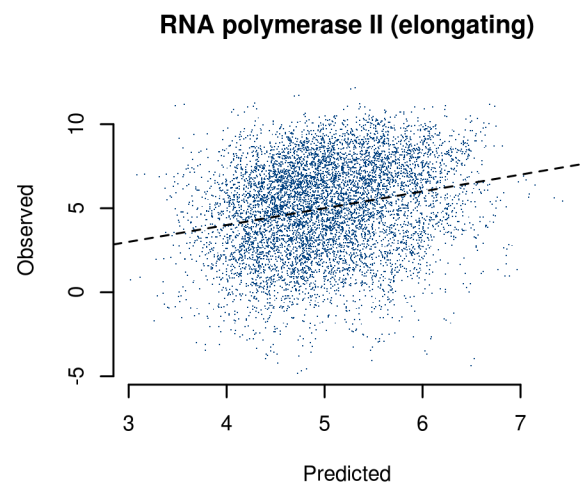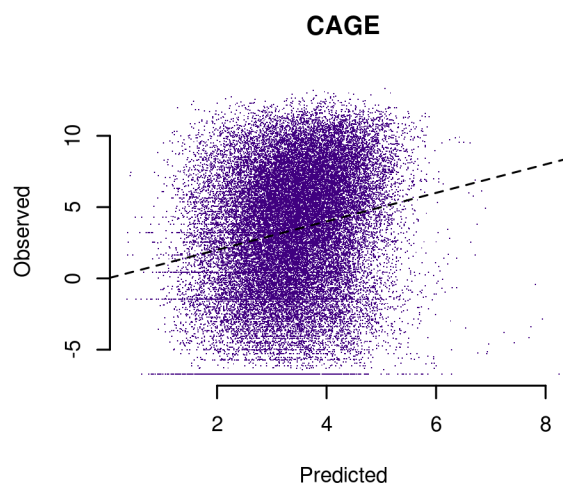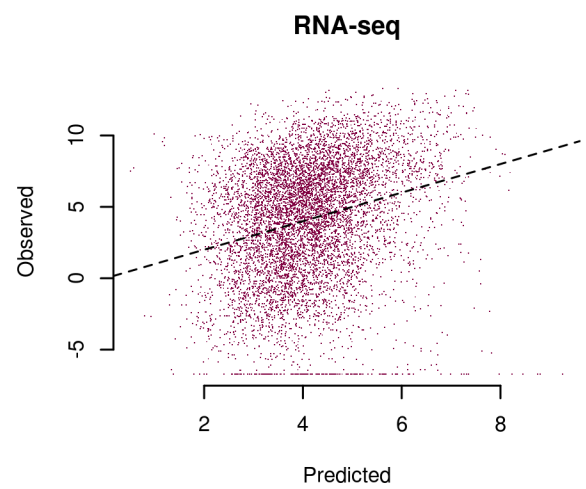

Figure S10

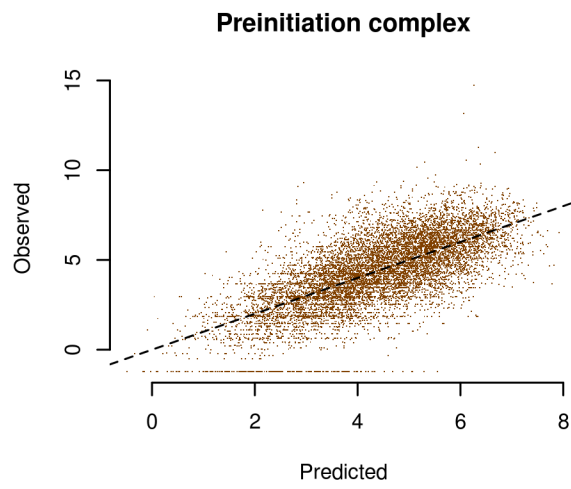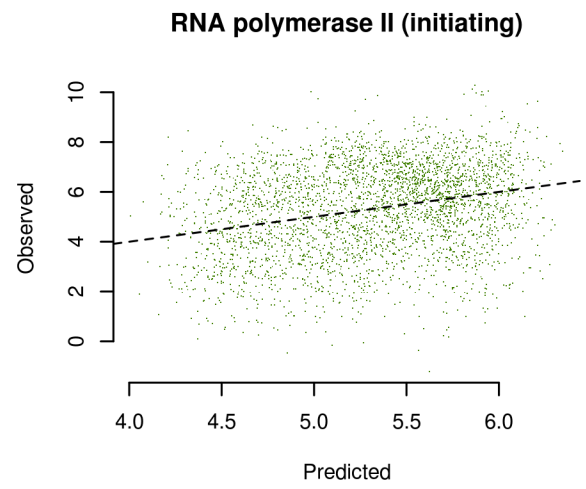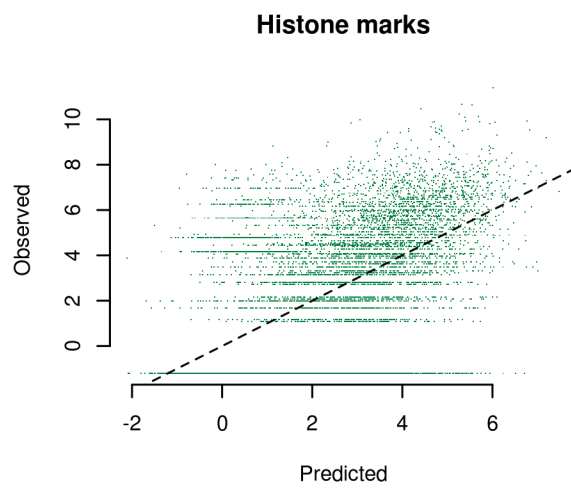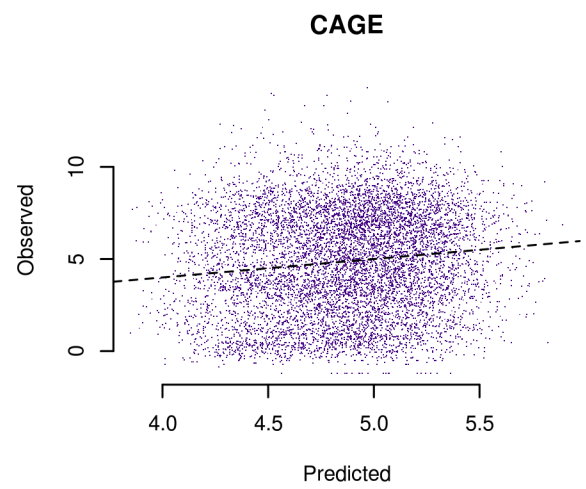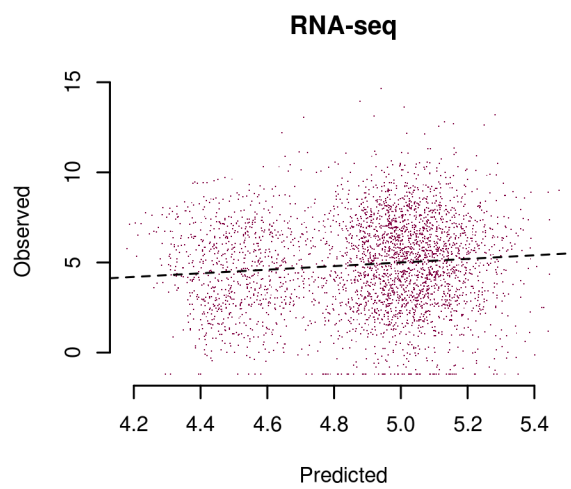

Figure S10

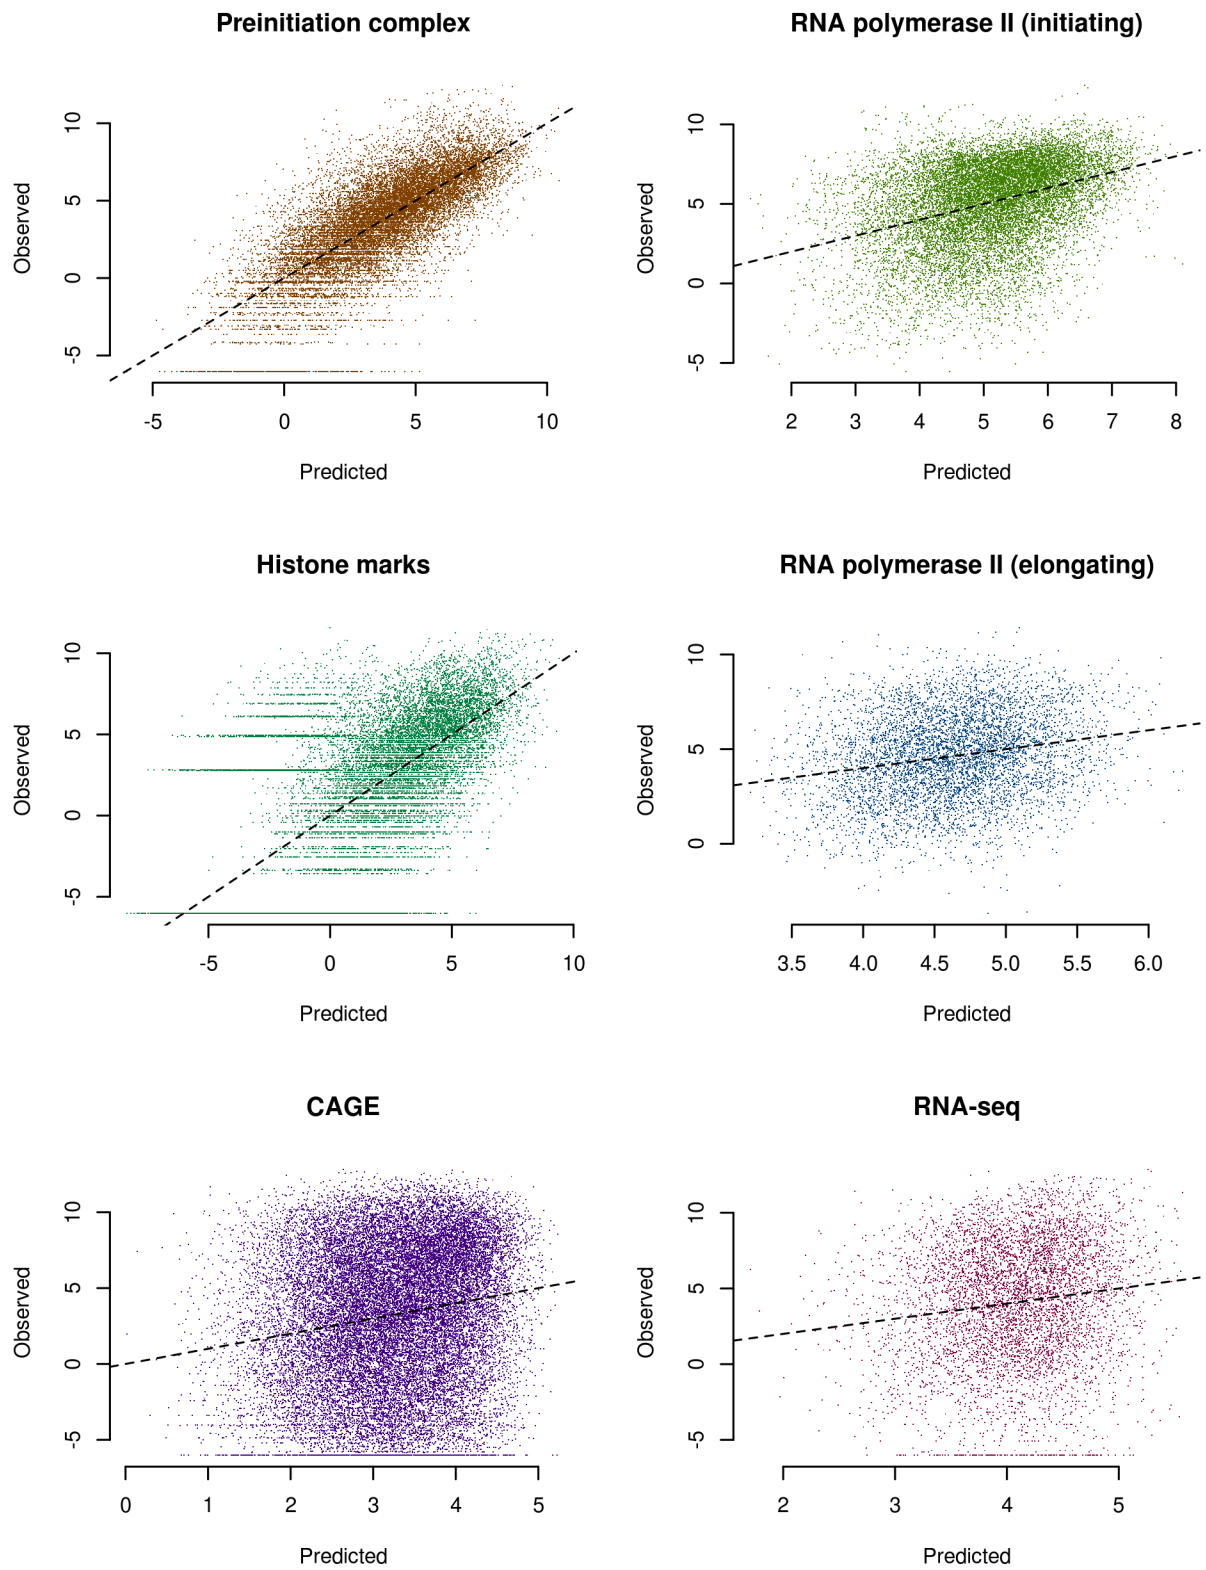

Figure S10: Leave-one-out cross-validation of PLS regression models. S10a: GM12878. S10b: K562. S10c: HepG2. S10d: H1-hESC. S10e: HeLa-S3.
