# Supplementary material for: Transcription-factor occupancy at HOT regions quantitatively predicts RNA polymerase recruitment in five human cell lines
Source: Springer Nature journal article supplement (doi:10.1186/1471-2164-14-720), 2013-01-01
Supplement: 12864_2013_7136_MOESM6_ESM.pdf [file 12864_2013_7136_MOESM6_ESM.pdf]

GM12878

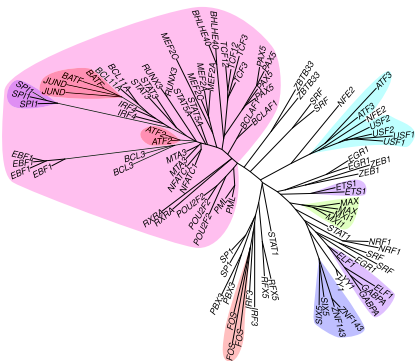

0.1

K562

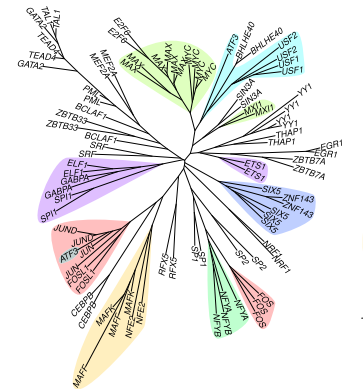

0.1

HepG2

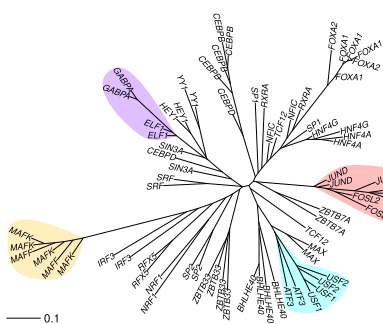

0.1

### Known cofactors

- AP-1
- MAF/NFE2
- MAX/MYC/MXI
- NFY

### Putative cofactors

- ATF3/USF
- SIX5/ZNF143

### Conserved binding domain

- ETS family

### Functional pathway

- Lymphocyte differentiation

H1-hESC

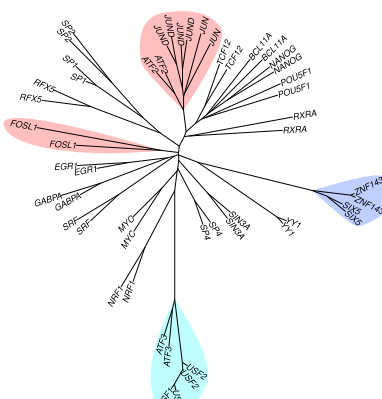

0.1

HeLa-S3

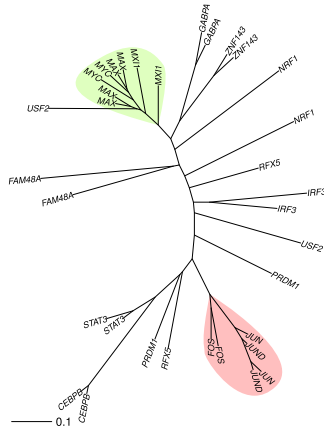

0.1
