# Supplementary material for: Transcription-factor occupancy at HOT regions quantitatively predicts RNA polymerase recruitment in five human cell lines
Source: Springer Nature journal article supplement (doi:10.1186/1471-2164-14-720), 2013-01-01

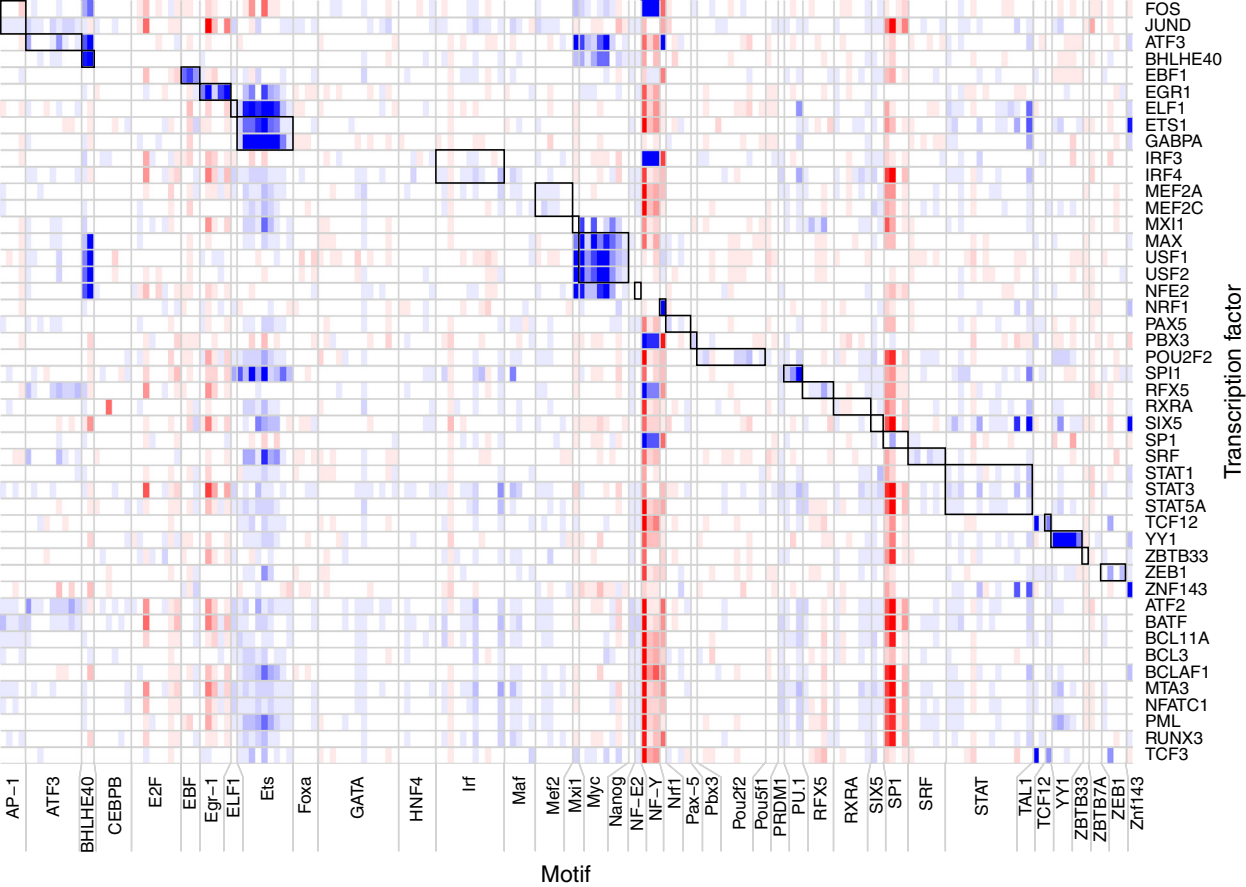

Supplement: 12864_2013_7136_MOESM8_ESM.pdf [file 12864_2013_7136_MOESM8_ESM.pdf]
