# Supplementary material for: Transcription-factor occupancy at HOT regions quantitatively predicts RNA polymerase recruitment in five human cell lines
Source: Springer Nature journal article supplement (doi:10.1186/1471-2164-14-720), 2013-01-01

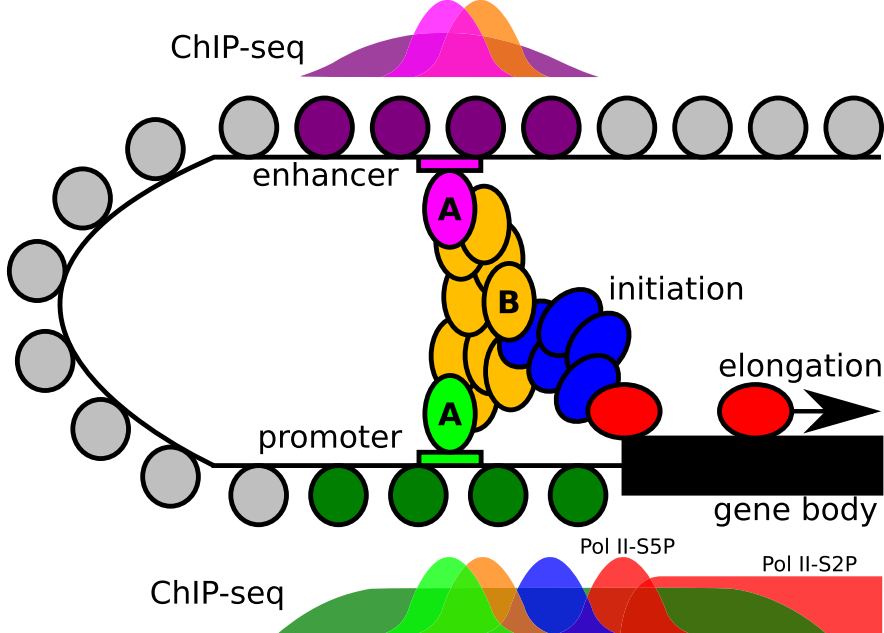

proteins

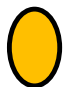

transcription factor

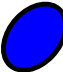

transcription machinery

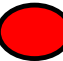

RNA polymerase II

CAGE

RNA-seq

sequence motif

histone marks

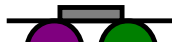

H3K4me1

H3K4me3

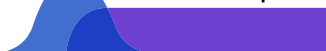

Supplement: 12864_2013_7136_MOESM10_ESM.pdf [file 12864_2013_7136_MOESM10_ESM.pdf]
